1           **JWA deficiency accelerates aging through disrupting intestinal epithelial**  
2                                   **homeostasis via Notch1/PPAR $\gamma$ /Stat5 axis**

3 **Authors:**

4 Xiong Li<sup>1,2,3</sup>, Jingwen Liu<sup>1,2,3</sup>, Luman Wang<sup>1,2,3</sup>, Yan Zhou<sup>1,2,3</sup>, Yifan Wen<sup>1,2,3</sup>, Kun Ding<sup>1,2,3</sup>,  
5 Lu Zou<sup>1,2,3</sup>, Xia Liu<sup>1,2,3</sup>, Aiping Li<sup>1,2,3</sup>, Yun Wang<sup>4</sup>, Heling Fu<sup>4</sup>, Min Huang<sup>5</sup>, Guoxian Ding<sup>5</sup> and  
6 Jianwei Zhou<sup>1,2,3,§</sup>

7  
8 **Affiliations:**

9 <sup>1</sup>Department of Molecular Cell Biology & Toxicology, Center for Global Health, School of  
10 Public Health, Nanjing Medical University, Nanjing 211166, China.

11 <sup>2</sup>Key Laboratory of Modern Toxicology of Ministry of Education, School of Public Health,  
12 Nanjing Medical University, Nanjing, 211166, China.

13 <sup>3</sup>Jiangsu Key Lab of Cancer Biomarkers, Prevention and Treatment, Collaborative  
14 Innovation Center for Cancer Medicine, Nanjing Medical University, Nanjing 211166, China.

15 <sup>4</sup>Animal Core Facility of Nanjing Medical University, Jiangsu Animal Experimental Center of  
16 Medical and Pharmaceutical Research, Nanjing 211166, China.

17 <sup>5</sup>Department of Geriatrics, Division of Geriatric Endocrinology, The First Affiliated Hospital of  
18 Nanjing Medical University, Nanjing 210029, China.

19  
20 **<sup>§</sup>Corresponding:**

21 Jianwei Zhou, M.D., Ph.D. Professor. Department of Molecular Cell Biology & Toxicology,  
22 Center for Global Health, School of Public Health, Nanjing Medical University. 101 Longmian  
23 Avenue, Jiangning District, Nanjing 211166, China. Phone/Fax: +86-25-8686-8421. Email:  
24 [jwzhou@njmu.edu.cn](mailto:jwzhou@njmu.edu.cn)

25  
26 **Total characters (including spaces):** 65,212

27  
28 **Total words:** 9,896

29 **Running title:** JWA deficiency accelerates aging

30

## 31 **Abstract**

32 Aging usually suppresses the renewal and regeneration of intestinal epithelium. The  
33 imbalance of intestinal epithelial homeostasis may also be a promoter for aging. JWA  
34 responds to oxidative stress and repairs damaged DNA; it participates in multiple cellular  
35 processes like cell proliferation and differentiation. Here we identified JWA as a new  
36 aging-associated gene, whose deletion-accelerated aging in mice was related to intestinal  
37 epithelium atrophy. We further knocked out intestinal epithelial JWA and found it disrupted  
38 intestinal epithelial homeostasis, thus promoting aging in mice. Mechanistically, we  
39 discovered that JWA deficiency promoted Notch1 ubiquitination degradation via ERK/Fbxw7  
40 cascade and interfered with the PPAR $\gamma$ /Stat5 signal axis. This reduced the intestinal stem  
41 cell function and altered the intestinal epithelial cell lineage distribution, finally suppressing  
42 the renewal and regeneration of intestinal epithelium. Our results demonstrated that JWA is  
43 a new aging-associated gene essential for the renewal and regeneration of intestinal  
44 epithelium. We also provide a new idea that maintaining intestinal epithelial homeostasis  
45 may be a potential anti-aging strategy in humans or mammals.

46 **Keywords:** JWA; Aging; Intestinal regeneration; Intestinal stem cell; Notch signal.

47

## 48 **Introduction**

49 The precise regulation of tissue renewal and regeneration is an effective mechanism to  
50 prevent and slow down tissue degeneration (Picerno *et al*, 2021). In mammals, the intestinal  
51 epithelium renews rapidly and usually turns over within 3-5 days, due to the organized cell  
52 proliferation, differentiation, migration, and apoptosis, as well as the regenerative capability  
53 of intestinal stem cells (ISCs) (Xiao *et al*, 2019). Unfortunately, these characteristics make  
54 intestinal epithelium more susceptible to external environmental factors like ionizing  
55 radiation. The high dose radiation exposure can induce intestinal epithelial injury followed by  
56 gastrointestinal syndrome (GIS). The ISCs respond immediately and regenerate quickly to  
57 repair the injured intestinal epithelium (Chaves-Perez *et al*, 2019). Therefore, certain factors  
58 that negatively affect the ISC maintenance can inevitably inhibit renewal and prevent  
59 regeneration of intestinal epithelium after injury.

60 Aging means the age-dependent, progressive and irreversible decline in physiological

61 functions that eventually leads to death. The degradation of various tissues and organs  
62 usually accompanies the aging process, making aging one of the main risk factors for  
63 human pathologies such as cancer, diabetes, cardiovascular disorders, and  
64 neurodegenerative diseases (Lopez-Otin *et al*, 2013). The turnover of intestinal epithelium  
65 often decreases with age due to the functional declines of ISC and supporting niche cells,  
66 causing slower renewal and regeneration in aging intestinal epithelium after  
67 irradiation-induced damage (Pentimikko *et al*, 2019).

68 On the other hand, intestinal epithelium plays an essential role in nutrient absorption; it  
69 is also the primary immune barrier to prevent lumen microorganisms and toxic substances  
70 from entering the circulation. The imbalance of nutrient intake through the intestine  
71 epithelium can promote aging and affect health of the elderly (Sun *et al*, 2021), although the  
72 dietary restriction (DR) without malnutrition has many profound beneficial effects on  
73 longevity (Green *et al*, 2022; Wang *et al*, 2022). Meanwhile, aging is also potentially related  
74 to intestinal microbial imbalance and inflammation (Shrout *et al*, 2021). Therefore, loss of  
75 intestinal epithelial integrity may be the driver for aging and obstacle to healthy aging.  
76 Intestinal epithelial homeostasis alteration can also influence the lifespan of lower creatures  
77 such as nematode and *Drosophila* (Sasaki *et al*, 2021; Yang *et al*, 2021), making the  
78 intestine considered a potential target organ for anti-aging (Rera *et al*, 2013). However,  
79 limited evidence proves that intestinal epithelial disruption accelerates aging, especially in  
80 mammals.

81 JWA, also named ADP-ribosylation-like factor 6 interacting protein 5 (Arl6ip5), is initially  
82 cloned from human bronchial epithelial (HBE) cells induced by all-trans retinoic acid. We  
83 previously demonstrated that JWA responded to oxidative stress and participated in DNA  
84 single-strand damage repair (Chen *et al*, 2007b; Wang *et al*, 2009), the unrepaired DNA  
85 damage accumulation-induced genome instability is one of the hallmarks of aging  
86 (Lopez-Otin *et al.*, 2013). We further found that JWA exerted neuroprotective role in the  
87 mouse model of Parkinson's disease via alleviating oxidative stress and inhibiting  
88 inflammation (Wang *et al*, 2018; Zhao *et al*, 2017). However, there is not enough exploration  
89 and evidence to prove whether JWA is involved in aging. Moreover, JWA participates in  
90 multiple cellular processes like cell proliferation, differentiation, and apoptosis (Chen *et al*,

91 2004; Li *et al*, 2003), making it capable of regulating intestinal epithelial renewal and  
92 regeneration. Therefore, it is an exciting hypothesis that JWA regulates intestinal epithelial  
93 renewal and regeneration, thus affecting the aging process.

94 In this study, we demonstrated that JWA was essential for the renewal and regeneration  
95 of intestinal epithelium, and for the first time we claimed that JWA deficiency accelerated  
96 aging through disrupting intestinal epithelial homeostasis in mice. Our results will also  
97 suggest the maintenance of intestinal epithelial homeostasis as a potential anti-aging  
98 strategy.

99

## 100 **Results**

### 101 **JWA is a new aging-associated gene**

102 To confirm the relationship between JWA and aging, we firstly examined JWA in the  
103 spleens and livers of mice and found the old mice had lower JWA levels than young mice  
104 (Fig. 1A, B, Appendix Fig. S1A and B). We previously generated the JWA knockout (JWA<sup>ko</sup>)  
105 mice, and in the present study we observed that JWA<sup>ko</sup> mice exhibited thinner bodies (Fig.  
106 1C) and lower body weight than wild type (JWA<sup>wt</sup>) mice starting from 4-week-old (Fig. 1D).  
107 Subsequently, we built a mice cohort for survival analysis, the survival curves depicted that  
108 the medium lifespan of JWA<sup>ko</sup> mice was only 290.0 days, which was significantly shorter  
109 than JWA<sup>wt</sup> mice (Fig. 1E). We performed a series of phenotypic analyses in mice at the  
110 young and relatively old stage and found multiple aging-related phenotypes in both young  
111 and old JWA<sup>ko</sup> mice, such as lost hair (Appendix Fig. S2A and S3A), deformed spine  
112 (Appendix Fig. S2B, C, S3B and C), disordered cardiovascular function (Appendix Fig  
113 S2D-G and S3D-G), and reduced basal metabolism (Appendix Fig. S2H-K and S3H-K).  
114 Furthermore, we observed elevated senescence-associated  $\beta$ -galactosidase (SA- $\beta$ -gal)  
115 positive cells in the JWA<sup>ko</sup> mice liver sections (Fig. 1F), indicating the cellular senescence.  
116 Our results suggested that JWA was a new aging-associated gene whose deletion  
117 accelerated mice aging.

### 118 **JWA deletion-accelerated aging originates from the intestine epithelium**

119 We explored the histomorphology of the principal organs of mice (Fig. 1G and Appendix  
120 Fig. S4) and found that the primary alteration was the atrophy of intestinal epithelium (Fig.

121 1G), which showed the reduced length of villi and crypts (Fig. 1H and I). We evaluated the  
122 intestine epithelium absorption through oral glucose tolerance test (OGTT) and found that  
123 JWA<sup>ko</sup> mice exhibited poor glucose absorption (Fig. 1J and K). Moreover, JWA<sup>ko</sup> mice  
124 consumed less food and water than JWA<sup>wt</sup> mice (Appendix Fig. S2H, I, S3H and I). These  
125 results further reminded us of the probable alterations of intestinal epithelial structure and  
126 function due to the JWA deficiency. Furthermore, we observed that JWA deletion delayed the  
127 development of intestinal epithelium in both embryonic (Fig. EV1A-D) and newborn mice  
128 (Fig. EV1E). However, there was no difference in the embryonic weight between JWA<sup>ko</sup> and  
129 JWA<sup>wt</sup> mice (Fig. EV1F). These results alluded that the intestine epithelium might be the  
130 originate of JWA deletion-accelerated aging.

### 131 **JWA expresses higher in intestinal crypts than villi**

132 Through The Human Protein Atlas database (<https://www.proteinatlas.org>), we got that  
133 the JWA mRNA and protein expressed widely in the human tissues and organs (Appendix  
134 Fig. S5A and B). JWA protein was highest existing in the human duodenum and the whole  
135 small intestine (Appendix Fig. S5B and C). We also detected that the JWA protein exhibited  
136 high levels in mouse intestine (Appendix Fig. S5D), especially the middle intestine (jejunum)  
137 (Appendix Fig. S5E and F). Moreover, we observed that the protein level of JWA was higher  
138 in intestinal crypts than villi (Fig. 2A). Therefore, we hypothesized that JWA might play a  
139 critical role in renewal and regeneration of intestinal epithelium, owing to the intestinal stem  
140 cells (ISCs) and niche cells located in the crypts, which are involved in the maintenance of  
141 intestinal epithelium.

### 142 **Intestinal epithelial JWA deletion destroys the homeostasis of the intestinal 143 epithelium and promotes mice aging**

144 To invest the role of JWA on intestinal epithelial homeostasis maintenance, we  
145 constructed the intestinal epithelial JWA knockout (JWA<sup>IEC-ko</sup>) and littermate wild type  
146 (JWA<sup>IEC-wt</sup>) mice (Fig. EV2A and B). We confirmed that both the mRNA and protein levels of  
147 JWA were significantly down-regulated in crypts (Fig. 2B-D, Fig. EV2C and D). In the mice  
148 cohort, we found that most of the JWA<sup>IEC-ko</sup> mice died before 10-month-old (Fig. 2E), and the  
149 survival rate of JWA<sup>IEC-ko</sup> mice was significantly lower than JWA<sup>IEC-wt</sup> mice (Fig. 2F). Like  
150 JWA<sup>ko</sup> mice, JWA<sup>IEC-ko</sup> mice also showed thinner bodies and lighter weights than JWA<sup>IEC-wt</sup>

151 mice. Interestingly, this only manifested at 10-month-old, rather than 2-month-old (Fig. 2G  
152 and H). We dissected the euthanized 10-month-old mice and found that most JWA<sup>IEC-ko</sup> mice  
153 showed intestinal congestion and bloat signs (Fig. 2I). We then observed that JWA<sup>IEC-ko</sup> mice  
154 had shorted villi and crypts than JWA<sup>IEC-wt</sup> mice, especially at 10-month-old (Fig. 2J-L).  
155 Furthermore, to verify our hypothesis that JWA deletion-accelerated aging originated from  
156 intestine epithelium, we stained the SA- $\beta$ -gal positive cells in liver sections from  
157 10-month-old mice and found more senescent cells in JWA<sup>IEC-ko</sup> mice than JWA<sup>IEC-wt</sup> mice  
158 (Fig. 2M). Moreover, we tested the activity of several redox-related enzymes such as  
159 superoxide dismutase (SOD), glutathione peroxidase (GSH-px), and catalase (CAT) in the  
160 serum of 10-month-old mice. We found the activities of the three enzymes were all reduced  
161 due to intestinal epithelial JWA deletion (Fig. EV2E-G), revealing the deterioration of  
162 antioxidant capacity potential, which was one of the hallmarks of aging. Our results  
163 suggested that intestinal epithelial JWA deletion could disrupt intestinal epithelial  
164 homeostasis, which might be an accelerator for the aging process in mice.

### 165 **Intestinal epithelial JWA deletion reduces intestinal stem cells**

166 Intestinal epithelial integrity depends on the proliferation, differentiation, migration of  
167 intestinal epithelial cells and function of intestinal stem cells. The ki67 staining showed  
168 intestinal epithelial JWA deletion inhibited the proliferation of crypt cells (Fig. 3A, B and Fig.  
169 EV3A). It also hindered the intestinal epithelium renewal, revealed by BrdU<sup>+</sup> cell migration  
170 assay (Fig. 2C and D). We next found that intestinal epithelial JWA deletion markedly  
171 reduced the ISC number at the intestinal crypts, revealed by the decrease of olfactomedin 4  
172 (olfm4) positive cells (Fig. 3E, F and Fig. EV3B-D). Moreover, reduced mRNA levels of ISC  
173 markers such as Leucine-rich repeat containing G protein-coupled receptor 5 (lgr5), olfm4,  
174 SPARC-related modular calcium-binding protein 2 (smoc2), Achaete-scute family BHLH  
175 transcription factor 2 (ascl2), and Musashi RNA binding protein 1 (msi1) were detected in  
176 crypts from JWA<sup>IEC-ko</sup> mice (Fig. 3G). These results further suggested that JWA deficiency  
177 might suppress the renewal and regeneration of intestinal epithelium.

### 178 **Intestinal epithelial JWA deletion skews the distributions of intestinal epithelial cells** 179 **lineage**

180 The distribution balance of IEC lineages also plays an essential role in intestinal

181 epithelial homeostasis maintenance. To explore the impact of JWA deficiency on IEC  
182 lineages, we examined the levels of various IEC markers. Results showed markedly  
183 decreased lysozyme positive Paneth cells number in crypts (Fig. 3H, I and Fig. EV3G),  
184 elevated muc2 and Alcian blue positive goblet cells in villi (Fig. 3J, K and Fig. EV3E-G) due  
185 to intestinal epithelial JWA deletion. Moreover, the mRNA levels of mature IECs markers  
186 further revealed the disordered composition of intestinal cell types caused by intestinal  
187 epithelial JWA deletion. Such as lower absorptive enterocyte markers (Sis, Lct, Dpp4) in villi  
188 (Fig. 3L and Fig. EV3H) and Paneth cell markers (Lyz1, Mmp7) in crypts (Fig. 3M and Fig.  
189 EV3H); higher goblet cell markers (Muc2, Spink4, Tuff3), enteroendocrine cell markers (Gcg,  
190 Ngn3, Reg4), and tuft cell markers (Dclk1, Hck) in villi (Fig. 3N and Fig. EV3H). Our results  
191 suggested intestinal epithelial JWA deletion might lead to secretory intestinal epithelial cell  
192 differentiation lineages, except Paneth cells.

### 193 **Intestinal epithelial JWA deletion exacerbates the injury and prevents intestinal** 194 **epithelial regeneration after whole abdomen X-ray irradiation exposure**

195 To investigate the regeneration capability of intestinal epithelium, we subjected the mice  
196 to whole abdomen X-ray irradiation (WAI) at a dose of 10 Gy. We sacrificed the mice at the  
197 indicated time points after WAI and collected crypts or paraffin sections from jejunum for  
198 later analysis (Fig. 4A and Fig. EV4A). We saw the rising of JWA in both mRNA and protein  
199 levels during the recovery period within five days after WAI, and returned to base levels on  
200 the seventh day (Fig. EV4B and C). In addition, interestingly, the mRNA levels of ISCs  
201 markers olf4 and lgr5 altered consistently with JWA (Fig. EV4C). These further prompted  
202 us that JWA participated in the regeneration of ISC and intestinal epithelium. However, as  
203 we expected, intestinal epithelial JWA deletion exacerbated the injury and prevented the  
204 regeneration of intestinal epithelium. The body weights of JWA<sup>IEC-ko</sup> mice lost faster than  
205 JWA<sup>IEC-wt</sup> mice (Fig. 4B). We dissected the mice and found that JWA<sup>IEC-ko</sup> mice showed  
206 visible intestinal hyperemia and swelling and markedly shorter intestine rather than JWA<sup>IEC-wt</sup>  
207 mice (Fig. 4C and D). We performed the intestinal epithelial permeability assay in mice after  
208 WAI and found that the intestinal epithelial of JWA<sup>IEC-ko</sup> mice were more permeable to FD4  
209 than JWA<sup>IEC-wt</sup> mice (Fig. 4E). We also observed worse damaged crypts and villi (Fig. 4F-H)  
210 and more cleaved caspase-3 (CC3) positive cells (Fig. 4I) in intestine sections from

211 JWA<sup>IEC-ko</sup> mice, revealing more severe intestinal epithelial injury than JWA<sup>IEC-wt</sup> mice.  
212 Moreover, we found fewer ki67 positive regenerative crypts (Fig. 4J and K) and fewer olfm4  
213 positive cells (Fig. 4L and M) in regenerative crypts owing to intestinal epithelial JWA  
214 deletion. These results suggested intestinal epithelial JWA deletion exacerbated the injury  
215 and prevented intestinal epithelial regeneration after WAI.

### 216 **JWA regulates PPAR $\gamma$ /Stat5 axis through Notch signal pathway**

217 To explore the JWA deletion-induced molecule alterations, we distinguished the  
218 differential proteins in jejunum tissues between JWA<sup>wt</sup> and JWA<sup>ko</sup> mice through proteomics  
219 analysis (Dataset. EV1). We discovered that JWA deletion distinctively down-regulated the  
220 protein levels of signal transducer and activator of transcription 5 (Stat5) (Fig. 5A), which  
221 was intimately related to the maintenance of ISC and intestinal epithelium. We then  
222 determined the reduced levels of stat5 in both jejunum from JWA<sup>ko</sup> mice and crypts from  
223 JWA<sup>IEC-ko</sup> mice (Fig. 5B and C), nevertheless, we could neither detect the phosphorylated  
224 stat5 in jejunum nor in crypts. Therefore, we examined the upstream molecule of stat5,  
225 Janus Kinase 2 (JAK2), and phosphorylated JAK2 in crypts (Fig. 5C), which could  
226 phosphorylate stat5 at tyrosine residues. However, JWA deletion did not alter the  
227 phosphorylated levels of JAK2 in crypts (Fig. 5C), reminding that JWA deficiency might not  
228 affect the phosphorylation of stat5. According to the report, stat5 could face the  
229 transcriptional repression resulting from over-expression of the transcription factor  
230 peroxisome proliferator-activated receptor-gamma (PPAR $\gamma$ ), which negatively affected ISCs  
231 maintenance. Results showed that JWA deletion did elevate the protein level of PPAR $\gamma$  and  
232 reduced the mRNA levels of stat5a and stat5b in crypts (Fig. 5C and D). Interestingly, JWA  
233 deletion also increased the mRNA level of PPAR $\gamma$  (Fig. 5D). We searched the JASPAR  
234 database (<https://jaspar.genereg.net/>) for the potential transcript factors (TFs) binding to the  
235 promoter region of PPAR $\gamma$ . We found that the primary TFs were the hairy and enhancer of  
236 splits (Hes), a target genes family of Notch signal (Appendix Table. S1). We quantified  
237 several Hes genes and found that JWA deletion drastically reduced the mRNA levels of hes1  
238 (Fig. 5E), a transcription repressor of PPAR $\gamma$ ; these results informed us that JWA deletion  
239 might cause Notch signal inhibition. We then confirmed that JWA deletion down-regulated  
240 the levels of the cleaved (CI) Notch1, Notch1 intracellular domain (NICD), and Hes1 in crypts



241 (Fig. 5F). However, the full-length (Fl) Notch1 showed no alterations in both protein and  
242 mRNA levels (Fig. 5F and G). Furthermore, we knocked down JWA levels in the rat intestinal  
243 epithelial cell line (IEC-6) by transfecting with short hairpin RNA of JWA (shJWA), and we  
244 observed the similar molecule changes as JWA deletion crypts (Fig. 5H). Fortunately, Hes1  
245 over-expression and the PPAR $\gamma$  antagonist GW9662 could retrieve the changes (Fig. 5I, J).  
246 Our results suggested that JWA deficiency disturbed PPAR $\gamma$ /Stat5a axis by inhibiting the  
247 Notch signal.

### 248 **JWA deficiency promotes ubiquitination degradation of Notch1 via ERK/Fbxw7 signal** 249 **axis**

250 To verify if JWA deficiency affected the stability of Notch1 protein, we conducted the  
251 cycloheximide (CHX)-chase assay in IEC-6 cells. Results showed that JWA deficiency  
252 accelerated Notch1 protein degradation (Fig. 6A and B). We then performed the *in vitro*  
253 ubiquitination assay and found that JWA deficiency promoted the degradation of Notch1 via  
254 ubiquitin-proteasome pathway (Fig. 6C). To gain insight into the reason for JWA  
255 deficiency-induced Notch1 degradation, we predicted the potential E3 ubiquitin ligases  
256 acting on Notch1 through the UbiBrowser Database  
257 (<https://ubibrowser.ncpsb.org.cn/ubibrowser/>). We screened the top five high-confidence  
258 scored ligases (Fig. EV5A) and verified them in JWA deficiency crypts and cells. However,  
259 JWA deficiency did not increase their levels in crypts or cells (Fig. EV5B and C). We have  
260 previously confirmed JWA as an upstream activator of the ERK/MAPK signal. Reportedly,  
261 ERK negatively regulates F-box and WD repeat domain containing-7 (Fbxw7), a known E3  
262 ubiquitin ligase targets multiple substrates including Notch1. Fbxw7 is also a candidate in  
263 the predicted list although with low-confidence score. Therefore, we suspected that JWA  
264 deficiency might promote degradation of Notch1 through ERK/Fbxw7 axis. It was worth  
265 noting that we did observe that JWA deficiency inhibited phosphorylation of ERK1/2 and  
266 increased the levels of Fbxw7 in both crypts and cells (Fig. 6D and Fig. EV5D). To further  
267 clarify the role of the ERK/Fbxw7 signal axis on JWA deficiency-induced Notch1 degradation,  
268 we administrated the cells with Pamoic Acid (PA), an ERK agonist. The results showed that  
269 of ERK activation could effectively inhibit Fbxw7 expression, reverse JWA  
270 deficiency-induced Notch1 downregulation and downstream molecular changes (Fig. 6E and

271 **Fig. EV5E**). Meanwhile, we transfected the cells with the small interfering RNA of Fbxw7  
272 (siFbxw7) and achieved the same consequent as PA treatment (**Fig. 6F and Fig. EV5F**).  
273 Furthermore, we performed the CHX-chase assay and the *in vitro* ubiquitination assay in PA  
274 treated or siFbxw7 transfected cells. Results showed that PA treatment or siFbxw7  
275 transfection could effectively enhance the stability of Notch1 and reduce the ubiquitination  
276 degradation of Notch1 caused by JWA deficiency (**Fig. 6G-L**). Our results suggested that  
277 JWA negatively regulates the E3 ubiquitin ligase Fbxw7 via ERK/MAPK signal and  
278 maintained the stability of Notch1. JWA deficiency promoted Notch1 degradation through the  
279 ubiquitin-proteasome pathway.

280

## 281 **Discussion**

282 Aging is a progressive physiological process accompanying the age-dependent decline  
283 in physiological functions until the end of life. Aging is the result of gene and environment  
284 interactions. Excessive ROS produced by environmental stimuli can induce oxidative  
285 stresses and DNA damages; the body can resolve these issues through antioxidation and  
286 DNA repair pathways (Chesnokova *et al.*, 2021; Lopez-Otin *et al.*, 2013). However,  
287 deficiencies or mutants of the antioxidation and DNA repair genes such as NF-E2-related  
288 factor-2 (Nrf2) and X-Ray Repair Cross Complementing 1 (XRCC1) allow the accumulation  
289 of unrepaired DNA damage, inducing genomic instability and cell dysfunction or apoptosis,  
290 thus promoting aging (Wang *et al.*, 2021; Zhao *et al.*, 2021). Otherwise, increasing DNA repair  
291 capability facilitates longevity (Chesnokova *et al.*, 2021). JWA is an environmental response  
292 gene upregulating under oxidative stress stimuli and regulates XRCC1 to repair the DNA  
293 single-strand breaks (Chen *et al.*, 2007b; Wang *et al.*, 2009). JWA also resists  
294 paraquat-induced oxidative stress in neurons by upregulating the Nrf2 level in Parkinson's  
295 disease (PD) mice model (Zhao *et al.*, 2017). The present study found that genetic JWA  
296 deletion induced multiple aging-related phenotypes and dramatically shortened lifespan in  
297 mice, suggesting that JWA was a new aging-associated gene.

298 Intestinal epithelium is a rapid renewal tissue composed of villi and crypts. The  
299 proliferative intestinal stem cells (ISCs) that reside in the bottom of crypts are responsible for  
300 epithelial maintenance. ISCs generate the transit-amplifying progenitor cells that

301 differentiate into mature intestinal epithelial cells (IECs) and migrate up to the villi to replace  
302 senescent or damaged IECs and complete epithelial renewal (Stine *et al*, 2019). These  
303 characteristics make the intestinal epithelium more susceptible to environmental factors  
304 such as ionizing radiation (Chaves-Perez *et al.*, 2019). Since the reduced ISC activity, the  
305 intestinal epithelium regenerates more slowly in old mice than young mice after  
306 irradiation-induced injury (He *et al*, 2020; Pentimikko *et al.*, 2019). The present study found  
307 intestinal epithelial JWA deletion dramatically inhibited the proliferating of crypt cells and  
308 reduced the number of *Igr5*<sup>+</sup> ISCs, thus causing epithelial atrophy, which was more  
309 noticeable in elderly mice. Moreover, we found that JWA responded to X-ray irradiation and  
310 participated in epithelial regeneration. Intestinal JWA deletion aggravated injury and  
311 prevented regeneration of the epithelium in mice after 10 Gy X-ray exposure; these  
312 phenotypes were similar to aging mice. Our results suggested that JWA was a regulator for  
313 intestinal epithelial maintenance and aging.

314 An important question is why JWA deficiency accelerates aging, considering the  
315 long-term nutrient malabsorption through depauperated intestinal epithelium. Dietary  
316 restriction (DR) without malnutrition is beneficial for improving aging and aging-related  
317 diseases. For example, reducing protein or specific EAAs is associated with longevity (Wang  
318 *et al.*, 2022). However, nutrition like EAAs is a double-edged sword in health maintenance.  
319 Restriction and supplementation of specific EAAs both show promising outcomes in  
320 expanding lifespan. Nonetheless, long-term restriction or deficiency of EAAs may lead to  
321 adverse events, such as growth retardation and aging acceleration (Navik *et al*, 2021). In  
322 this study, JWA gene deletion resulted in intestinal epithelial dysplasia from the embryonic  
323 stage to the whole life cycle of mice. Intestinal epithelium is the predominant area for nutrient  
324 absorption. Therefore, epithelial atrophy may undoubtedly cause long-term malnutrition,  
325 thus inducing stunted growth and promoting aging. The present study showed that JWA  
326 deletion reduced food, water intake and intestinal absorption, caused light weight and thin  
327 body in mice. These results were parallel to the existing report on mice lacking the  
328 Glutamate transporter associated protein 3-18 (GTRAP3-18), an alternate name of JWA  
329 (Aoyama *et al*, 2018). Although JWA deletion-induced intestinal maldevelopment in mice  
330 embryo, it did not alter the embryo weight due to the independent of intestinal absorption in

331 embryonic growth. Our results suggested that JWA deficiency-induced intestinal epithelial  
332 atrophy might cause chronic malnutrition and accelerated aging. To detailly explain the  
333 reason for JWA deficiency accelerated aging, more research programs, such as epithelial  
334 absorption and metabonomic analysis for nutrients, need to conduct.

335 Multiple signaling transduction pathways, including Wnt, Notch, EGF, BMI, YAP/TAZ,  
336 etc., independently or cooperatively maintain intestinal epithelial homeostasis through ISC  
337 dependent renewal and regeneration (Beumer & Clevers, 2021). JAK/STAT signaling  
338 pathway is a central node that regulates cellular processes through signal transduction (Hu  
339 *et al*, 2021). It responds to tissue turnover and regeneration via regulating stem cells,  
340 including hematopoietic stem cells (Holdreith *et al*, 2021), embryonic stem cells (Lin *et al*,  
341 2021), as well as ISCs (Du *et al*, 2020). It is also a maintainer for cancer stem cells and  
342 promoter for multiple cancers, such as colorectal cancer (Silva *et al*, 2021). Stat5, consisting  
343 of the transcription activator Stat5a and Stat5b, is a positive contributor to ISC and intestinal  
344 epithelial regeneration in the dextran sulfate sodium (DSS)-induced colitis, *Clostridium*  
345 *difficile* infection-induced Ileocolitis, and irradiation-induced intestinal injury mouse models  
346 (Gilbert *et al*, 2015; Liu *et al*, 2019). In the present study, our preliminary discovery on the  
347 mechanism was that JWA deficiency down-regulated Stat5 at both the transcription and  
348 translation levels, suggesting that JWA maintains intestinal epithelium through Stat5  
349 signaling.

350 PPARs, consist of three subtypes ( $\alpha$ ,  $\delta/\beta$ , and  $\gamma$ ), are nuclear hormone receptors  
351 activated by fatty acids and endogenous ligands, and responsible for lipid and glucose  
352 metabolism homeostasis (Mihaylova *et al*, 2018; Trauner & Fuchs, 2022). PPAR $\alpha$  and  
353 PPAR $\delta/\beta$  is able to augment ISC function in high-fat diet, aging and injury (Mana *et al*, 2021;  
354 Mihaylova *et al.*, 2018), and promotes intestinal tumorigenesis (Mana *et al.*, 2021). PPAR $\gamma$   
355 plays bidirectional roles in ISC and epithelial maintenance. On the one hand, PPAR $\gamma$   
356 regulates the proliferation and differentiation of intestinal progenitor cells through the  
357 region-specific promotion of fatty acid oxidation, and maintains intestinal epithelial renewal  
358 (Stine *et al.*, 2019). On the other hand, high PPAR $\gamma$  activity shows the inhibitory effect on  
359 Wnt/ $\beta$ -catenin signal pathway and impairs Lgr5<sup>+</sup> ISC function (Pereira *et al*, 2020), and leads  
360 to colon cancer stem cells inhibition (Moon *et al*, 2014). Moreover, PPAR $\gamma$  activation inhibits

361 various signals, including JAK/STAT (Vallee *et al*, 2018). The inhibitory effect on leukemia  
362 stem cells works by suppressing Stat5 expression (Kumar *et al*, 2020). The present study  
363 showed that JWA deficiency elevated both transcription and translation levels of PPAR $\gamma$ ,  
364 considering it a reason for Stat5 reduction.

365 The Notch signal pathway regulates cell proliferation, differentiation, tumorigenesis, and  
366 stem cell maintenance (Siebel & Lendahl, 2017; Silva *et al.*, 2021). Transcription repressor  
367 Hes1 is a target gene of Notch signal and plays an essential role in stem and progenitor cell  
368 maintenance; it is reported to prevent hematopoietic stem cell exhaustion by suppressing  
369 PPAR $\gamma$  expression (Ma *et al*, 2020; Wu *et al*, 2021). Moreover, Notch/Hes1 axis inhibition  
370 accompanied by PPARG activation can repress the progression of colorectal cancer via  
371 suppressing cancer stem cells (Moon *et al.*, 2014). Here we reported that JWA deficiency  
372 inhibited Notch signal through ubiquitin-proteasome pathway-mediated degradation of the  
373 Notch1 receptor. The down-regulation of Notch target gene Hes1 was also the reason for  
374 PPAR $\gamma$  activation due to JWA deficiency. The E3-ubiquitin ligase Fbxw7 targets multiple  
375 substrates such as c-jun, c-myc, and Notch1; it works as a tumor suppressor for colorectal  
376 cancer by inhibiting Notch signal. However, Fbxw7 deletion alters the maintenance of  
377 intestinal stem/progenitor cells and the fate of differentiated cells and induces colorectal  
378 tumorigenesis via losing suppression on Notch in mice intestine (Babaei-Jadidi *et al*, 2011;  
379 Sancho *et al*, 2010). The tumor suppressor Fbxw7 expression is inversely correlated with  
380 ERK activation in pancreatic cancer, sustained activation of the Ras-Raf-MEK-ERK pathway  
381 phosphorylates Fbxw7 at Thr205, and destabilizes Fbxw7 (Ji *et al*, 2015; Ye *et al*, 2021). We  
382 previously demonstrated that JWA was an upstream activator of the ERK/MAPK signal  
383 pathway (Chen *et al*, 2007a; Mao *et al*, 2006). The present study showed that JWA  
384 deficiency up-regulated Fbxw7 expression by inhibiting the phosphorylation of ERK1/2, thus  
385 promoting Notch1 degradation via ubiquitin-proteasome pathway. However, more exact  
386 mechanism by which JWA regulates the Notch signal pathway need further investigation.

387 Notch signal promotes the IECs differentiation into enterocyte lineage while  
388 antagonizing secretory cell fate in intestine (Ludikhuizen *et al*, 2020; Sancho *et al.*, 2010),  
389 which is reversed by Fbxw7 deletion (Sancho *et al.*, 2010). The present study found that  
390 intestinal JWA deletion promoted differentiated IECs into secretory cell lineages and

391 suppressed the absorbing cell lineages. However, Paneth cells were reduced, presumably  
392 due to the suppression of Paneth cells by JWA deficiency-caused stat5 down-regulation (Liu  
393 *et al.*, 2019). Therefore, the typical phenotype of Notch signal inhibition, co-localization of  
394 Paneth cell marker Lysozyme and Goblet cell marker Muc2 in crypts (Stine *et al.*, 2019), was  
395 not observed in JWA<sup>IEC-ko</sup> mice. The reason for JWA deficiency-caused differential regulation  
396 on Paneth cells and other secretory cell lineages is an interesting issue worthy of further  
397 exploration.

398 In summary, the present study verified that JWA deficiency accelerated aging through  
399 disrupting intestinal epithelial homeostasis. Mechanistically, we found that JWA deficiency  
400 promoted Notch1 degradation via the ubiquitin-proteasome pathway in the ERK/Fbxw7  
401 dependent manner, thus disturbing the PPAR $\gamma$ /Stat5 axis. This is the reason for ISC function  
402 decline and IEC lineages skew. It will now be important to expound how JWA  
403 deficiency-induced intestinal epithelial atrophy accelerating aging, whether it is due to  
404 nutrient malabsorption or other complex issues. Our results may also provide the intestinal  
405 epithelial homeostasis maintenance as a potential anti-aging strategy. Moreover, JWA may  
406 also be a potential intervention target for stem cell-driven colorectal cancer, although JWA is  
407 a suppressor for gastric and breast cancer (Ren *et al.*, 2021; Zhang *et al.*, 2021).

408

## 409 **Materials and Methods**

### 410 **Mouse**

411 JWA<sup>flox/flox</sup>, JWA<sup>wt</sup> and JWA<sup>ko</sup> mice were described in our previous study (Gong *et al.*,  
412 2012). Villin-cre mouse on a C57BL/6 background was obtained from Shanghai Model  
413 Organisms Center (Shanghai, China). Wild type C57BL/6 mouse was purchased from SLAC  
414 Laboratory Animal Co., Ltd (Shanghai, China). JWA<sup>IEC-ko</sup> mouse was generated by  
415 cross-mating Villin-cre mouse with JWA<sup>flox/flox</sup> mouse. All mice were maintained in the Animal  
416 Core Facility of Nanjing Medical University in a specific pathogen-free (SPF) condition. The  
417 animal operations were approved by the Institutional Animal Care and Use Committee of  
418 Nanjing Medical University (Approval No. IACUC-2004044).

### 419 **SA- $\beta$ -gal staining**

420 Freshly isolated liver tissue was embedded in the Tissue-Tek O.C.T compound (Sakura,

421 Tokyo, Japan) and quick-frozen on dry ice. The 10  $\mu\text{m}$  thickness frozen section was  
422 prepared on the CM1950 cryostat (Leica Biosystem, Wetzlar, Germany) and stained using a  
423 Senescent cell  $\beta$ -galactosidase staining kit (Servicebio, Wuhan, China) according to the  
424 manufacturer's guidelines.

#### 425 **Intestinal absorption assay by oral glucose tolerance test**

426 Mouse was orally administrated with 6 mg/kg glucose. The blood glucose levels at  
427 indicated time points were measured using a handheld blood glucometer (Sinocare,  
428 Changsha, China) through tail tips.

#### 429 **BrdU<sup>+</sup> cell migration assay**

430 Mouse was intraperitoneally injected with 100 mg/kg BrdU (APExBIO, Houston, TX,  
431 USA) dissolved in saline. The jejunum was isolated and fixed in 4% paraformaldehyde 3  
432 hours after injection. The BrdU<sup>+</sup> cells were detected by immunofluorescence using the BrdU  
433 antibody.

#### 434 **Serum oxidoreductase activity detection**

435 The whole blood was collected from the post-ocular vein of mouse and centrifugated to  
436 separate the serum. Enzymatic activities were measured using the Total Superoxide  
437 Dismutase (SOD) Assay Kit (Beyotime, Shanghai, China), Catalase (CAT) Detection Kit, and  
438 Glutathione Peroxidase (GSH-Px) Detection Kit (Aifang Biological, Changsha, China)  
439 according to the manufacturer's protocol.

#### 440 **Intestinal villus and crypt isolation**

441 Mouse intestine was isolated and flushed with phosphate-buffered saline (PBS)  
442 supplemented with penicillin/streptomycin. The jejunum was opened longitudinally and  
443 scraped by coverslip to separate the villus composition, which was washed several times in  
444 PBS with penicillin/streptomycin. The remained jejunum was washed several times in PBS  
445 and cut into 5 mm pellets, crypts were isolated by shaking the pellets violently in PBS  
446 supplemented with 5 mM EDTA.

#### 447 **X-ray exposure**

448 Mouse was anesthetized and placed into the RS 2000 Pro X-ray irradiator (Rad Source  
449 Technologies, Buford, GA, USA) to receive X-ray exposure (10 Gy, 1.5 Gy/min), the  
450 exposure area was limited to the whole abdomen by the control of built-in beam limiter in the

451 instrument. Mouse was sacrificed on the indicated days after irradiation, the blood and  
452 intestine were collected for further experiment.

### 453 **Intestinal permeability assay**

454 Mouse was orally administrated with 15 mg fluorescein isothiocyanate isomer-dextran 4  
455 kDa (FD4, Sigma-Aldrich, St. Louis, MO, USA), serum was collected 4 hours later. The total  
456 fluorescence intensity (Excitation: 485 nm, Emission: 528 nm) in serum was detected on the  
457 Infinite M200 PRO fluorescence microplate reader (TECAN, Männedorf, Switzerland). The  
458 concentration of FD4 was calculated via a standard curve prepared with serial dilutions of  
459 FD4.

### 460 **Histology, immunohistochemistry, and immunofluorescence**

461 Isolated tissue was fixed in 4% paraformaldehyde and embedded in paraffin. The 6  $\mu$ m  
462 thickness section was prepared on the Microm HM 340 E rotary microtome (Thermo  
463 Scientific, Waltham, MA, USA), and dewaxed in xylene and serial concentrations of ethanol  
464 before staining. For hematoxylin-eosin (H&E) and Alcian blue staining, the dewaxed section  
465 was stained using the H&E staining kit or Alcian blue staining kit (Servicebio, Wuhan, China)  
466 according to the manufacturer's protocol. For immunohistochemistry, the dewaxed section  
467 was boiled in Tris-EDTA antigen retrieval buffer (0.01 M Tris, 1 mM EDTA, 0.05% Tween 20,  
468 pH 9.0) for 10 min and incubated with the primary antibody (Appendix Table S2) at 4°C  
469 overnight after being blocked with 5% bovine serum albumin (BSA). Then the section was  
470 incubated with horseradish peroxidase (HRP)-labeled secondary antibody and stained using  
471 the DAB Color Development Kit (Servicebio, Wuhan, China). The section was permanently  
472 mounted using the glycerol jelly mounting medium (Servicebio, Wuhan, China) after  
473 dehydrated and clarified in ethanol and xylene. For immunofluorescence, the section was  
474 incubated with Alexa Fluor dye-labeled secondary antibody and mounted using the ProLong  
475 Diamond Antifade Mountant with DAPI (Thermo Scientific, Waltham, MA, USA). The images  
476 were obtained using the Panoramic MIDI digital slide scanner system (3DHISTECH,  
477 Budapest, Hungary).

### 478 **Proteomics analysis**

479 Freshly isolated jejunum was flushed with PBS with penicillin/streptomycin, and  
480 quick-frozen in liquid nitrogen. The protein spectrum analysis was performed by CapitalBio



481 Technology (Beijing, China).

## 482 **Cell culture, transfection, and treatment**

483 Rat small intestinal epithelial crypt (IEC-6) cell (Zhong Qiao Xin Zhou, Shanghai, China)  
484 was cultured in Dulbecco's modified eagle medium supplemented with 10% fetal bovine  
485 serum (TransGen Biotech, Beijing, China), 100U/ml penicillin, 0.1mg/ml streptomycin  
486 (Biyotime, Shanghai, China) and 10 µg/ml recombinant human insulin (Zhong Qiao Xin Zhou,  
487 Shanghai, China). For cell transfection, shRNA plasmids for JWA (Keris, Nanjing, China),  
488 siRNA for Fbxw7 (GenPharma, Shanghai, China) and their nonspecific control were  
489 synthesized (Appendix Table S3), and the commercial HA-hes1 plasmid was purchased  
490 (Youbio, Changsha, China). The plasmids and siRNA were transfected or co-transfected  
491 using the Lipo8000 transfection reagent (Biyotime, Shanghai, China) following the  
492 manufacturer's protocol. To activate the phosphorylation of ERK1/2 or suppress the  
493 expression of PPAR $\gamma$ , the cell was treated with 10 µM pamoic acid (Macklin, Shanghai,  
494 China) or 10 µM GW9662 (MedChemExpress, Monmouth Junction, NJ, USA) for 24 hours.  
495 For the CHX-chase assay, the cell was treated with 100 µg/ml cycloheximide (CHX) at the  
496 indicated time points.

## 497 **Immunoblotting**

498 Total protein was extracted using the RIPA lysis buffer (50mM Tris, 150mM NaCl, 1%  
499 Triton X-100, 1% sodium deoxycholate, 0.1% SDS, pH 7.4) supplemented with protease and  
500 phosphatase inhibitor cocktail (NCM, Suzhou, China) and quantified using the bicinchoninic  
501 acid assay (BCA) kit (Beyotime, Shanghai, China). Protein (20-40 µg/lane) was separated  
502 by sodium dodecyl sulfate-polyacrylamide gel electrophoresis (SDS-PAGE) and blotted onto  
503 polyvinylidene fluoride (PVDF) membrane. The membrane was probed with diluted primary  
504 antibody (Appendix Table S2) at 4 °C overnight after being blocked in 5% non-fat powder  
505 milk. The blot was detected using an Enhanced Chemiluminescence (ECL) detection kit  
506 (Vazyme, Nanjing, China) on the Chemiluminescence Image Analysis System (Tanon,  
507 Shanghai, China) after the HRP-labeled secondary antibody incubation.

## 508 **Quantitative reverse transcription and polymerase chain reaction (qRT-PCR)**

509 Total mRNA was isolated using the RNAiso Plus reagent (Takara, Beijing, China) and  
510 reverse transcribed using the HiScript II 1st Strand cDNA Synthesis Kit with gDNA wiper

511 (Vazyme, Nanjing, China). The PCR reaction procedure was carried out on the ABI 7900HT  
512 Real-Time PCR System (Applied Biosystems, Carlsbad, CA, USA) with the AceQ qPCR  
513 SYBR Green Master Mix (Vazyme, Nanjing, China) following the manufacturer's instruction.  
514 The synthetic cDNA was used as the template in the reaction, the primer pairs were listed in  
515 Appendix Table S4.

### 516 ***In vitro* ubiquitination assay**

517 The cell was transfected with ubiquitin plasmid and treated with 10  $\mu$ M MG132 (Selleck,  
518 Houston, TX, USA) for 6 hours. Total protein was then isolated using RIPA lysis buffer.  
519 Approximately 500  $\mu$ g/250  $\mu$ l protein per sample was incubated with the Notch1 antibody at  
520 4 °C overnight and followed by incubated with Protein A/G Plus-Agarose (Beyotime,  
521 Shanghai, China) at 4 °C overnight. After being washed in PBS and centrifuged, the  
522 ubiquitin level in the precipitation was detected by immunoblotting.

### 523 **Statistical analysis**

524 Data was analyzed on GraphPad Prism 8.0 software with the two-tail independent  
525 samples student's *t* test, log-rank test, or Fisher's exact test according to demand. The  
526 number of sample (*n*) was indicated in the figure legends. Data was presented as mean with  
527 standard deviation (mean  $\pm$  SD) in the figures. *P* <0.05 was defined as the statistical  
528 difference.

529

### 530 **Data availability**

531 Source data supporting this study was available upon request.

532

### 533 **Acknowledgements**

534 This study was supported by the National Natural Science of China (Grant number:  
535 81973156, 81673219).

536

### 537 **Author contributions**

538 JWZ and XLi designed the research; JWZ, LMW, YZ and YFW maintained and  
539 genotyped the mice; KD, LZ and XLi assisted with experiments; APL managed the  
540 laboratory and assisted JWZ and XLi; YW and HLF assisted with the phenotype analysis;

541 MH and GXD provided advises in aging research field; XLi and JWZ drafted and revised the  
542 manuscript; JWZ was the leading principal investigator in this research project.

543

#### 544 **Conflict of interest**

545 The authors declare that they have no conflict of interest.

546

#### 547 **Reference**

548 Aoyama K, Bhadhprasit W, Watabe M, Wang F, Matsumura N, Nakaki T (2018) GTRAP3-18  
549 regulates food intake and body weight by interacting with pro-opiomelanocortin. *FASEB J*  
550 32: 330-341

551 Babaei-Jadidi R, Li N, Saadeddin A, Spencer-Dene B, Jandke A, Muhammad B, Ibrahim EE,  
552 Muraleedharan R, Abuzinadah M, Davis H *et al* (2011) FBXW7 influences murine  
553 intestinal homeostasis and cancer, targeting Notch, Jun, and DEK for degradation. *J Exp*  
554 *Med* 208: 295-312

555 Beumer J, Clevers H (2021) Cell fate specification and differentiation in the adult mammalian  
556 intestine. *Nat Rev Mol Cell Biol* 22: 39-53

557 Chaves-Perez A, Yilmaz M, Perna C, de la Rosa S, Djouder N (2019) URI is required to  
558 maintain intestinal architecture during ionizing radiation. *Science* 364

559 Chen H, Bai J, Ye J, Liu Z, Chen R, Mao W, Li A, Zhou J (2007a) JWA as a functional  
560 molecule to regulate cancer cells migration via MAPK cascades and F-actin cytoskeleton.  
561 *Cell Signal* 19: 1315-1327

562 Chen HR, Li AQ, Li AP, Zhou JW (2004) JWA protein binds to alpha-tubulin in PC12 cells.  
563 *Chinese Sci Bull* 49: 467-471

564 Chen R, Qiu W, Liu Z, Cao X, Zhu T, Li A, Wei Q, Zhou J (2007b) Identification of JWA as a  
565 novel functional gene responsive to environmental oxidative stress induced by  
566 benzo[a]pyrene and hydrogen peroxide. *Free Radic Biol Med* 42: 1704-1714

567 Chesnokova V, Zonis S, Apostolou A, Estrada HQ, Knott S, Wawrowsky K, Michelsen K,  
568 Ben-Shlomo A, Barrett R, Gorbunova V *et al* (2021) Local non-pituitary growth hormone is  
569 induced with aging and facilitates epithelial damage. *Cell Rep* 37: 110068

570 Du G, Xiong L, Li X, Zhuo Z, Zhuang X, Yu Z, Wu L, Xiao D, Liu Z, Jie M *et al* (2020)

- 571 Peroxisome Elevation Induces Stem Cell Differentiation and Intestinal Epithelial Repair.  
572 *Dev Cell* 53: 169-184 e111
- 573 Gilbert S, Nivarthi H, Mayhew CN, Lo YH, Noah TK, Vallance J, Rulicke T, Muller M, Jegga  
574 AG, Tang W *et al* (2015) Activated STAT5 confers resistance to intestinal injury by  
575 increasing intestinal stem cell proliferation and regeneration. *Stem Cell Reports* 4:  
576 209-225
- 577 Gong Z, Shi Y, Zhu Z, Li X, Ye Y, Zhang J, Li A, Li G, Zhou J (2012) JWA deficiency  
578 suppresses dimethylbenz[a]anthracene-phorbol ester induced skin papillomas via  
579 inactivation of MAPK pathway in mice. *PLoS One* 7: e34154
- 580 Green CL, Lamming DW, Fontana L (2022) Molecular mechanisms of dietary restriction  
581 promoting health and longevity. *Nat Rev Mol Cell Biol* 23: 56-73
- 582 He D, Wu H, Xiang J, Ruan X, Peng P, Ruan Y, Chen YG, Wang Y, Yu Q, Zhang H *et al*  
583 (2020) Gut stem cell aging is driven by mTORC1 via a p38 MAPK-p53 pathway. *Nat*  
584 *Commun* 11: 37
- 585 Holdreith N, Lee GY, Chandra V, Salas Salinas C, Nicholas P, Olson TS, Tong W (2021) LNK  
586 (SH2B3) Inhibition Expands Healthy and Fanconi Anemia Human Hematopoietic Stem  
587 and Progenitor Cells. *Blood Adv*
- 588 Hu X, Li J, Fu M, Zhao X, Wang W (2021) The JAK/STAT signaling pathway: from bench to  
589 clinic. *Signal Transduct Target Ther* 6: 402
- 590 Ji S, Qin Y, Shi S, Liu X, Hu H, Zhou H, Gao J, Zhang B, Xu W, Liu J *et al* (2015) ERK kinase  
591 phosphorylates and destabilizes the tumor suppressor FBW7 in pancreatic cancer. *Cell*  
592 *Res* 25: 561-573
- 593 Kumar H, Chattopadhyay S, Das N, Shree S, Patel D, Mohapatra J, Gurjar A, Kushwaha S,  
594 Singh AK, Dubey S *et al* (2020) Leprosy drug clofazimine activates peroxisome  
595 proliferator-activated receptor-gamma and synergizes with imatinib to inhibit chronic  
596 myeloid leukemia cells. *Haematologica* 105: 971-986
- 597 Li AQ, Li AP, Mao WG, Chen HR, Huang S, Qi H, Ye J, Zhang ZD, Wang XR, Sun F *et al*  
598 (2003) JWA, a novel microtubule-associated protein, regulates homeostasis of  
599 intracellular amino acids in PC12 cells. *Chinese Sci Bull* 48: 1828-1834
- 600 Lin J, Zeng J, Sun W, Liu K, Enkhbat M, Yi D, Harati J, Liu J, Kingshott P, Chen B *et al* (2021)

601 Colloidal Self-Assembled Patterns Maintain the Pluripotency and Promote the  
602 Hemopoietic Potential of Human Embryonic Stem Cells. *Front Cell Dev Biol* 9: 771773  
603 Liu R, Moriggl R, Zhang D, Li H, Karns R, Ruan HB, Niu H, Mayhew C, Watson C, Bangar H  
604 *et al* (2019) Constitutive STAT5 activation regulates Paneth and Paneth-like cells to  
605 control *Clostridium difficile* colitis. *Life Sci Alliance* 2  
606 Lopez-Otin C, Blasco MA, Partridge L, Serrano M, Kroemer G (2013) The hallmarks of aging.  
607 *Cell* 153: 1194-1217  
608 Ludikhuize MC, Meerlo M, Gallego MP, Xanthakis D, Burgaya Julia M, Nguyen NTB,  
609 Brombacher EC, Liv N, Maurice MM, Paik JH *et al* (2020) Mitochondria Define Intestinal  
610 Stem Cell Differentiation Downstream of a FOXO/Notch Axis. *Cell Metab* 32: 889-900  
611 e887  
612 Ma Z, Xu J, Wu L, Wang J, Lin Q, Chowdhury FA, Mazumder MHH, Hu G, Li X, Du W (2020)  
613 Hes1 deficiency causes hematopoietic stem cell exhaustion. *Stem Cells* 38: 756-768  
614 Mana MD, Hussey AM, Tzouanas CN, Imada S, Barrera Millan Y, Bahceci D, Saiz DR, Webb  
615 AT, Lewis CA, Carmeliet P *et al* (2021) High-fat diet-activated fatty acid oxidation mediates  
616 intestinal stemness and tumorigenicity. *Cell Rep* 35: 109212  
617 Mao WG, Liu ZL, Chen R, Li AP, Zhou JW (2006) JWA is required for the antiproliferative  
618 and pro-apoptotic effects of all-trans retinoic acid in Hela cells. *Clin Exp Pharmacol*  
619 *Physiol* 33: 816-824  
620 Mihaylova MM, Cheng CW, Cao AQ, Tripathi S, Mana MD, Bauer-Rowe KE, Abu-Remaileh  
621 M, Clavain L, Erdemir A, Lewis CA *et al* (2018) Fasting Activates Fatty Acid Oxidation to  
622 Enhance Intestinal Stem Cell Function during Homeostasis and Aging. *Cell Stem Cell* 22:  
623 769-778 e764  
624 Moon CM, Kwon JH, Kim JS, Oh SH, Jin Lee K, Park JJ, Pil Hong S, Cheon JH, Kim TI, Kim  
625 WH (2014) Nonsteroidal anti-inflammatory drugs suppress cancer stem cells via inhibiting  
626 PTGS2 (cyclooxygenase 2) and NOTCH/HES1 and activating PPARG in colorectal cancer.  
627 *Int J Cancer* 134: 519-529  
628 Navik U, Sheth VG, Khurana A, Jawalekar SS, Allawadhi P, Gaddam RR, Bhatti JS, Tikoo K  
629 (2021) Methionine as a double-edged sword in health and disease: Current perspective  
630 and future challenges. *Ageing Res Rev* 72: 101500

- 631 Pentinmikko N, Iqbal S, Mana M, Andersson S, Cognetta AB, 3rd, Suciu RM, Roper J,  
632 Luopajarvi K, Markelin E, Gopalakrishnan S *et al* (2019) Notum produced by Paneth cells  
633 attenuates regeneration of aged intestinal epithelium. *Nature* 571: 398-402
- 634 Pereira B, Amaral AL, Dias A, Mendes N, Muncan V, Silva AR, Thibert C, Radu AG, David L,  
635 Maximo V *et al* (2020) MEX3A regulates Lgr5(+) stem cell maintenance in the developing  
636 intestinal epithelium. *EMBO Rep* 21: e48938
- 637 Picerno A, Stasi A, Franzin R, Curci C, di Bari I, Gesualdo L, Sallustio F (2021) Why  
638 stem/progenitor cells lose their regenerative potential. *World J Stem Cells* 13: 1714-1732
- 639 Ren Y, Chen D, Zhai Z, Chen J, Li A, Liang Y, Zhou J (2021) JAC1 suppresses proliferation  
640 of breast cancer through the JWA/p38/SMURF1/HER2 signaling. *Cell Death Discov* 7: 85
- 641 Rera M, Azizi MJ, Walker DW (2013) Organ-specific mediation of lifespan extension: more  
642 than a gut feeling? *Ageing Res Rev* 12: 436-444
- 643 Sancho R, Jandke A, Davis H, Diefenbacher ME, Tomlinson I, Behrens A (2010) F-box and  
644 WD repeat domain-containing 7 regulates intestinal cell lineage commitment and is a  
645 haploinsufficient tumor suppressor. *Gastroenterology* 139: 929-941
- 646 Sasaki A, Nishimura T, Takano T, Naito S, Yoo SK (2021) white regulates proliferative  
647 homeostasis of intestinal stem cells during ageing in *Drosophila*. *Nat Metab* 3: 546-557
- 648 Shrout MR, Madison AA, Renna ME, Alfano CM, Povoski SP, Lipari AM, Agnese DM,  
649 Carson WE, 3rd, Malarkey WB, Bailey MT *et al* (2021) The gut connection: Intestinal  
650 permeability as a pathway from breast cancer survivors' relationship satisfaction to  
651 inflammation across treatment. *Brain Behav Immun* 100: 145-154
- 652 Siebel C, Lendahl U (2017) Notch Signaling in Development, Tissue Homeostasis, and  
653 Disease. *Physiol Rev* 97: 1235-1294
- 654 Silva VR, Santos LS, Dias RB, Quadros CA, Bezerra DP (2021) Emerging agents that target  
655 signaling pathways to eradicate colorectal cancer stem cells. *Cancer Commun (Lond)* 41:  
656 1275-1313
- 657 Stine RR, Sakers AP, TeSlaa T, Kissig M, Stine ZE, Kwon CW, Cheng L, Lim HW, Kaestner  
658 KH, Rabinowitz JD *et al* (2019) PRDM16 Maintains Homeostasis of the Intestinal  
659 Epithelium by Controlling Region-Specific Metabolism. *Cell Stem Cell* 25: 830-845 e838
- 660 Sun B, Zhao Y, Lu W, Chen Y (2021) The Relationship of Malnutrition With Cognitive

- 661 Function in the Older Chinese Population: Evidence From the Chinese Longitudinal  
662 Healthy Longevity Survey Study. *Front Aging Neurosci* 13: 766159
- 663 Trauner M, Fuchs CD (2022) Novel therapeutic targets for cholestatic and fatty liver disease.  
664 *Gut* 71: 194-209
- 665 Vallee A, Lecarpentier Y, Guillevin R, Vallee JN (2018) Opposite Interplay Between the  
666 Canonical WNT/beta-Catenin Pathway and PPAR Gamma: A Potential Therapeutic Target  
667 in Gliomas. *Neurosci Bull* 34: 573-588
- 668 Wang D, Ye J, Shi R, Zhao B, Liu Z, Lin W, Liu X (2022) Dietary protein and amino acid  
669 restriction: Roles in metabolic health and aging-related diseases. *Free Radic Biol Med* 178:  
670 226-242
- 671 Wang L, Lu Z, Zhao J, Schank M, Cao D, Dang X, Nguyen LN, Nguyen LNT, Khanal S,  
672 Zhang J *et al* (2021) Selective oxidative stress induces dual damage to telomeres and  
673 mitochondria in human T cells. *Aging Cell* 20: e13513
- 674 Wang R, Zhao X, Xu J, Wen Y, Li A, Lu M, Zhou J (2018) Astrocytic JWA deletion  
675 exacerbates dopaminergic neurodegeneration by decreasing glutamate transporters in  
676 mice. *Cell Death Dis* 9: 352
- 677 Wang S, Gong Z, Chen R, Liu Y, Li A, Li G, Zhou J (2009) JWA regulates XRCC1 and  
678 functions as a novel base excision repair protein in oxidative-stress-induced DNA  
679 single-strand breaks. *Nucleic Acids Res* 37: 1936-1950
- 680 Wu L, Li X, Lin Q, Chowdhury F, Mazumder MH, Du W (2021) FANCD2 and HES1 suppress  
681 inflammation-induced PPAR to prevent haematopoietic stem cell exhaustion. *Br J*  
682 *Haematol* 192: 652-663
- 683 Xiao L, Li XX, Chung HK, Kalakonda S, Cai JZ, Cao S, Chen N, Liu Y, Rao JN, Wang HY *et*  
684 *al* (2019) RNA-Binding Protein HuR Regulates Paneth Cell Function by Altering  
685 Membrane Localization of TLR2 via Post-transcriptional Control of CNPY3.  
686 *Gastroenterology* 157: 731-743
- 687 Yang K, Li Q, Zhang G, Ma C, Dai X (2021) The Protective Effects of Carrageenan  
688 Oligosaccharides on Intestinal Oxidative Stress Damage of Female *Drosophila*  
689 *melanogaster*. *Antioxidants (Basel)* 10
- 690 Ye Z, Zhuo Q, Hu Q, Xu X, Mengqi L, Zhang Z, Xu W, Liu W, Fan G, Qin Y *et al* (2021)

691 FBW7-NRA41-SCD1 axis synchronously regulates apoptosis and ferroptosis in  
692 pancreatic cancer cells. *Redox Biol* 38: 101807

693 Zhang Y, Chen J, Che Z, Shu C, Chen D, Ding K, Li A, Zhou J (2021) JP3 enhances the  
694 toxicity of cisplatin on drug-resistant gastric cancer cells while reducing the damage to  
695 normal cells. *J Cancer* 12: 1894-1906

696 Zhao H, Song L, Ma N, Liu C, Dun Y, Zhou Z, Yuan D, Zhang C (2021) The dynamic  
697 changes of Nrf2 mediated oxidative stress, DNA damage and base excision repair in testis  
698 of rats during aging. *Exp Gerontol* 152: 111460

699 Zhao X, Wang R, Xiong J, Yan D, Li A, Wang S, Xu J, Zhou J (2017) JWA antagonizes  
700 paraquat-induced neurotoxicity via activation of Nrf2. *Toxicol Lett* 277: 32-40

701

702

703 **Synopsis**

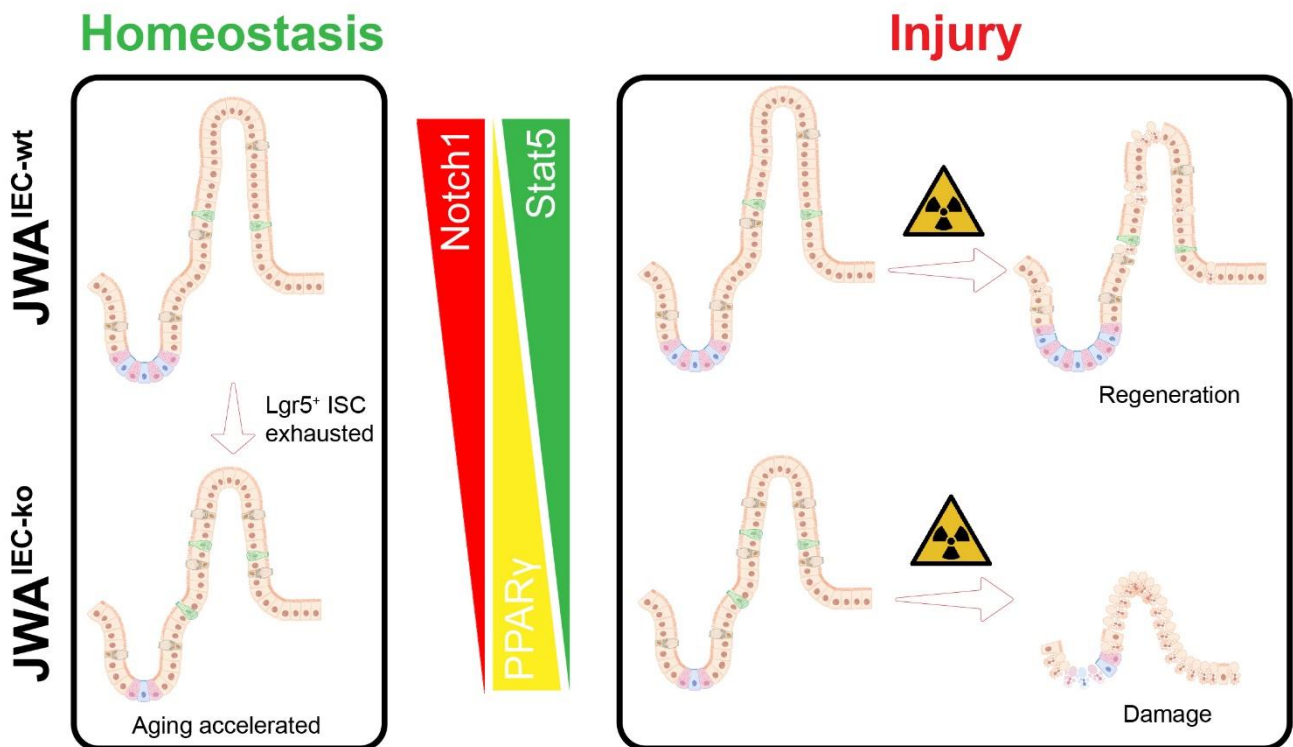

704

705

706

707

708



709

710

711

712

713

714

715

716

717

718

719

720

721 **Figure Legends.**

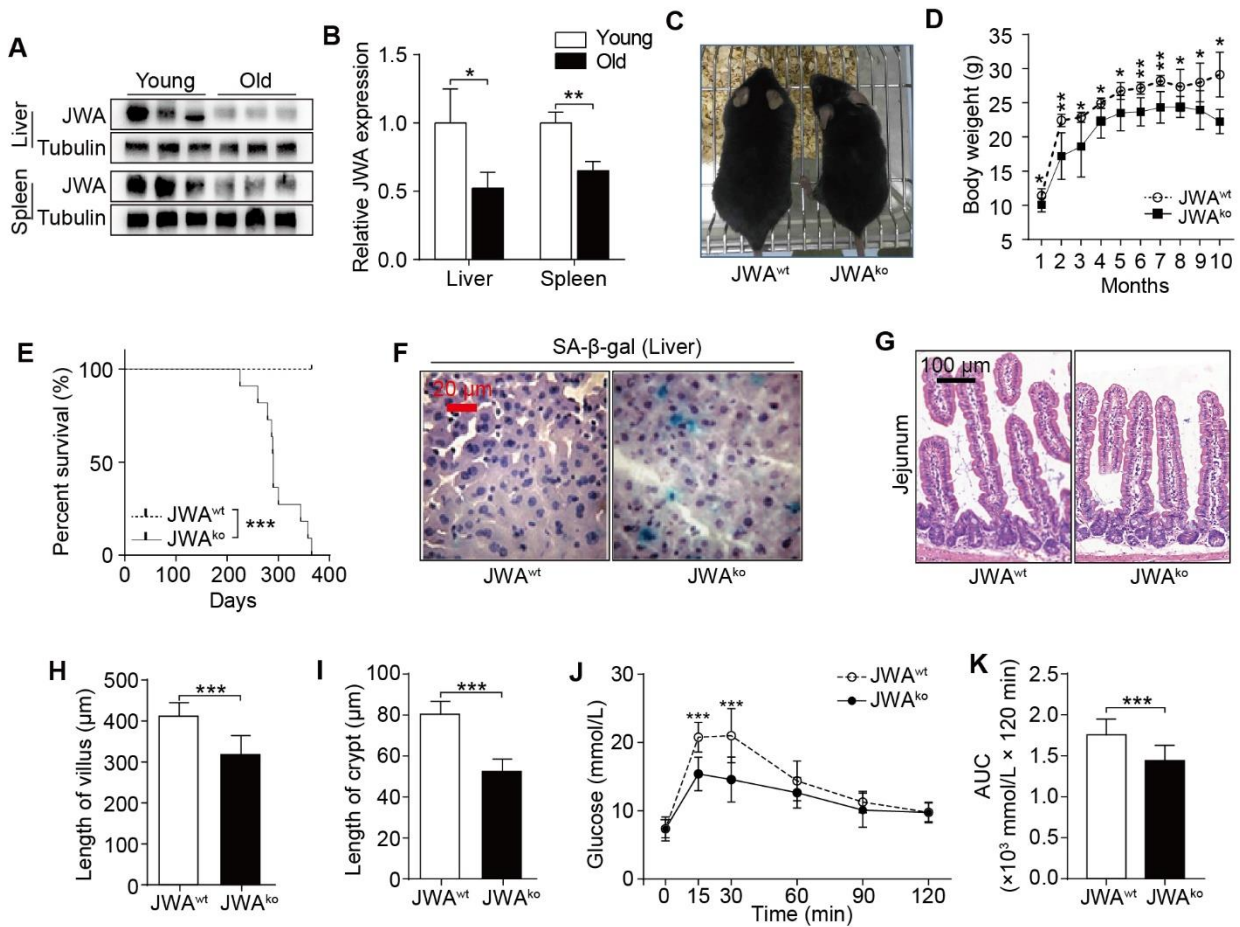

**Figure 1**

722

723 **Figure 1. JWA is a new aging-associated gene whose deletion accelerates aging**  
724 **through disrupting intestinal epithelial homeostasis.**

725 A, B. Immunoblotting of JWA (A) and relatively JWA levels (B) in the liver and spleen of  
726 young (2-month-old, n=3) and old (20-month-old, n=3) mice.

727 C. Representative photograph of 6-month-old JWA<sup>wt</sup> and JWA<sup>ko</sup> mice.

728 D. Body weight curve of JWA<sup>wt</sup> and JWA<sup>ko</sup> mice from 1-month-old to 10-month-old; n=6 for  
729 each genotype.

730 E. Survival curve of JWA<sup>wt</sup> and JWA<sup>ko</sup> mice; n=12 for JWA<sup>wt</sup> mice and n=11 for JWA<sup>ko</sup> mice.

731 F. SA-β-gal staining in the liver sections of JWA<sup>wt</sup> and JWA<sup>ko</sup> mice. Scale bar: 20 μm.

732 G-I. H&E staining of the jejunum sections (K), and the length measurement of villi (L) and  
733 crypts (M) in 6-month-old JWA<sup>wt</sup> and JWA<sup>ko</sup> mice; n=3 for each genotype; scale bar: 100 μm.

734 J, K. OGTT curve (N) and the AUC measurement (O) in 6-month-old JWA<sup>wt</sup> and JWA<sup>ko</sup> mice;  
735 n=12 for each genotype.

736 Data information: In (B, D, H-K), data are presented as mean ± SD, \**P* < 0.05, \*\**P* < 0.01 and  
737 \*\*\**P* < 0.001 (Student's *t*-test). In (E), \*\*\**P* < 0.001 (Log-Rank test).

738

739

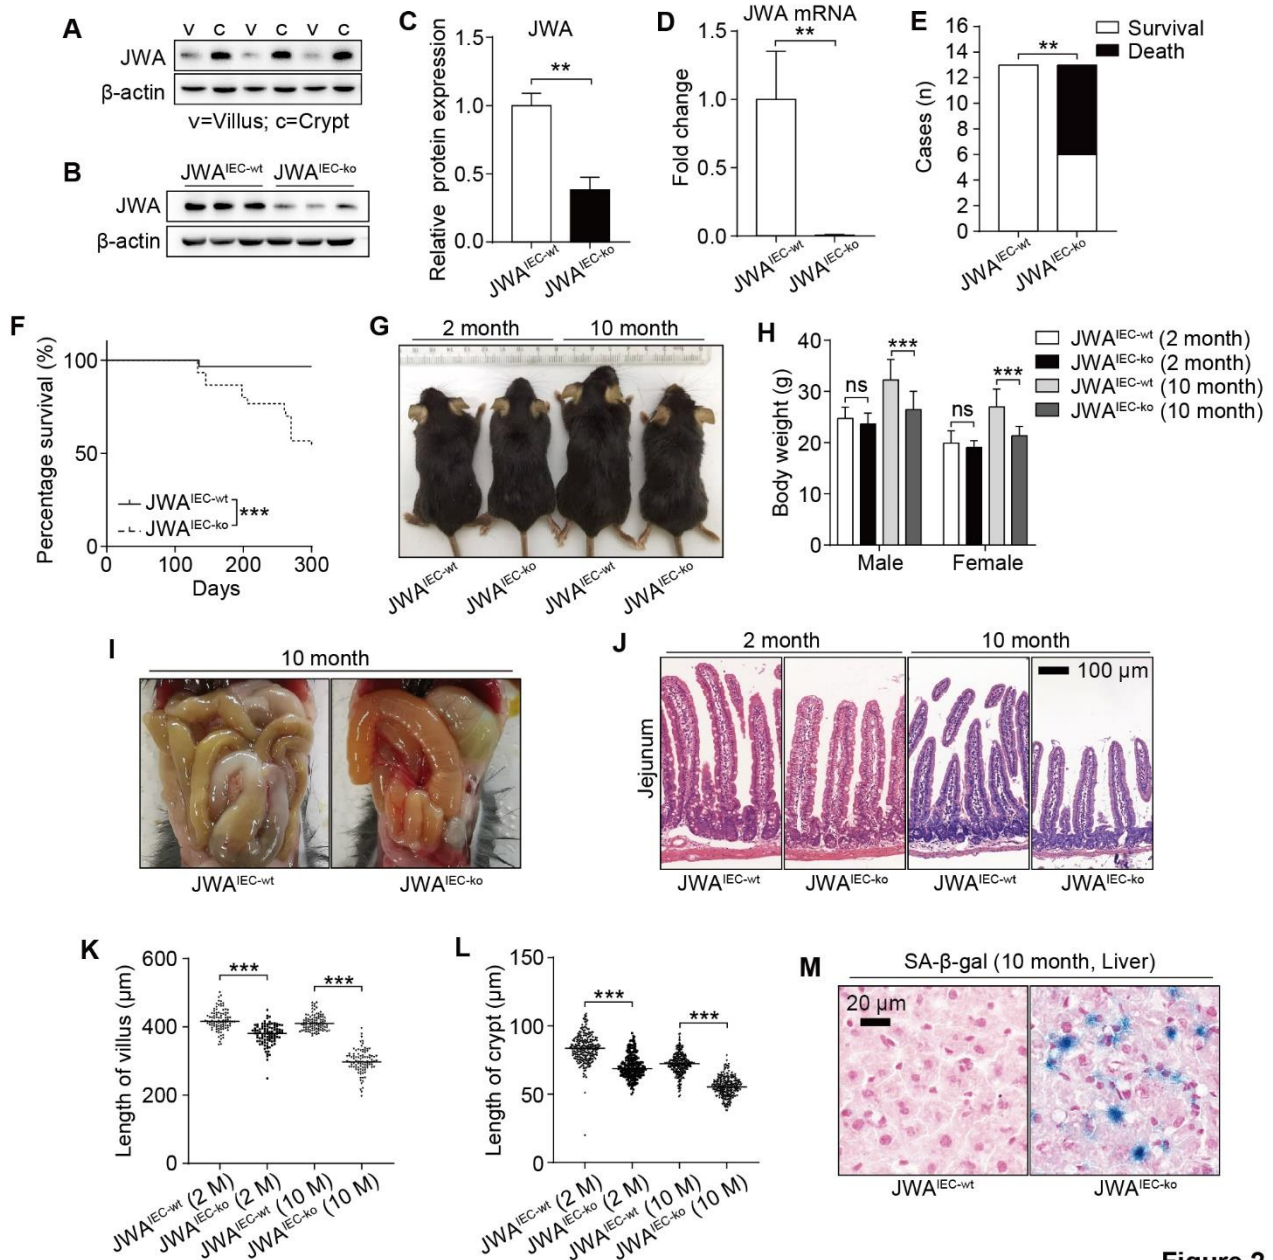

Figure 2

740

741 **Figure 2. Intestinal epithelial JWA deletion disrupts intestinal epithelial homeostasis**  
 742 **and accelerates mice aging.**

743 A. Immunoblotting of JWA in intestinal villi and crypts of wild-type mice; n=3, “v” represents  
 744 “villi”; “c” represents “crypts”.

745 B, C. Immunoblotting of JWA protein (B) and relatively JWA levels (C) in crypts of  $JWA^{IEC-wt}$   
 746 and  $JWA^{IEC-ko}$  mice; n=3 for each genotype.

747 D. QRT-PCR detection of JWA levels in crypts of  $JWA^{IEC-wt}$  and  $JWA^{IEC-ko}$  mice; n=3 for each  
 748 genotype.

749 E. Statistics of death and survival JWA<sup>IEC-wt</sup> and JWA<sup>IEC-ko</sup> mice by the end of 10-month-old;  
750 n=13 for each genotype at initial.

751 F. Survival curve of JWA<sup>IEC-wt</sup> and JWA<sup>IEC-ko</sup> mice by the end of 10-month-old; n=30 for each  
752 genotype.

753 G. Representative photograph of JWA<sup>IEC-wt</sup> and JWA<sup>IEC-ko</sup> mice at 2-month-old and  
754 10-month-old respectively.

755 H. Body weight of JWA<sup>IEC-wt</sup> and JWA<sup>IEC-ko</sup> mice at 2-month-old and 10-month-old  
756 respectively; n=6-11 for each genotype.

757 I. Representative abdominal cavity images of JWA<sup>IEC-wt</sup> and JWA<sup>IEC-ko</sup> mice at 10-month-old.

758 J-L. H&E staining of the jejunum sections (J), and the length measurement of villi (K) and  
759 crypts (L) in JWA<sup>IEC-wt</sup> and JWA<sup>IEC-ko</sup> mice at 2-month-old and 10-month-old respectively;  
760 n=3 for each genotype; scale bar: 100µm.

761 M. SA-β-gal staining in the liver sections of JWA<sup>IEC-wt</sup> and JWA<sup>IEC-ko</sup> mice at 10-month-old.  
762 Scale bar: 20 µm.

763 Data information: In (C, D, H, K, L), data are presented as mean ± SD, <sup>ns</sup> No significance, \*\**P*  
764 <0.01 and \*\*\**P* <0.001 (Student's *t*-test). In (E), \*\**P* <0.01 (Fisher's exact test). In (F), \*\*\**P*  
765 <0.001 (Log-Rank test).

766

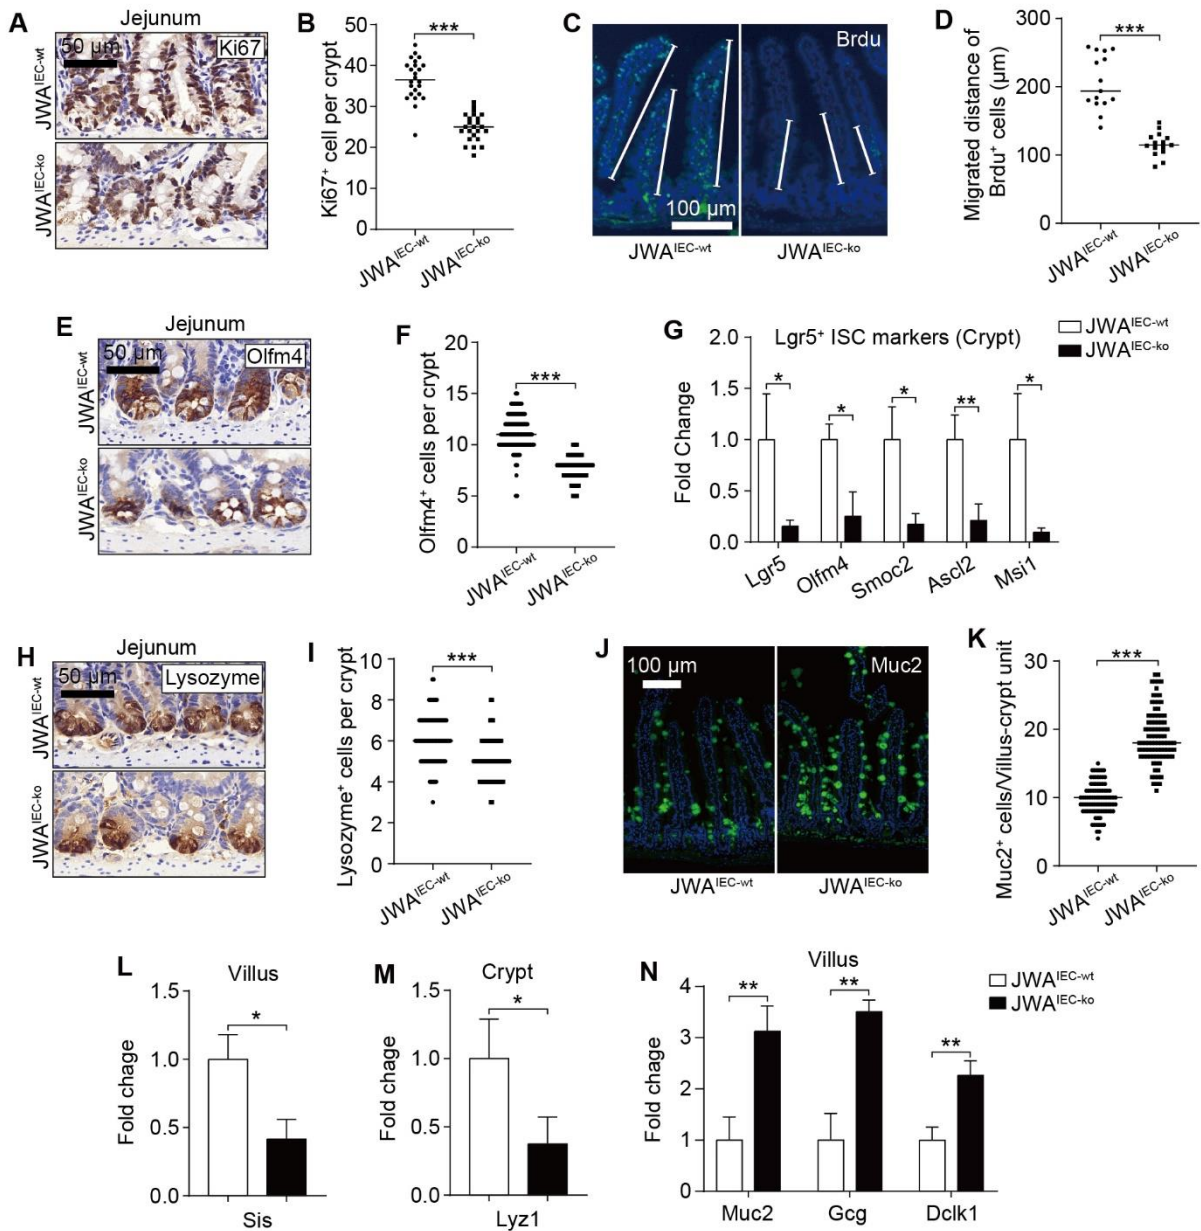

**Figure 3**

767

768 **Figure 3. Intestinal epithelial JWA deletion reduces intestinal stem cells and skews**  
 769 **the distributions of intestinal epithelial cells lineage.**

770 A, B. Immunohistochemistry staining of ki67 in the intestinal sections of JWA<sup>IEC-wt</sup> and JWA<sup>IEC-ko</sup>  
 771 mice (A), and the ki67 positive cell counts in crypts (B); n=3 for each genotype; scale bar: 50  
 772  $\mu$ m.

773 C, D. Immunofluorescence staining of BrdU in the intestinal sections of JWA<sup>IEC-wt</sup> and  
 774 JWA<sup>IEC-ko</sup> mice (C), and the BrdU positive cells migration measurement (D); n=3 for each  
 775 genotype; scale bar: 100  $\mu$ m.

776 E, F. Immunohistochemistry staining of olfm4 in the intestinal sections of JWA<sup>IEC-wt</sup> and JWA<sup>IEC-ko</sup>

777 mice (E), and the olfm4 positive cell counts in crypts (F); n=3 for each genotype; scale bar:  
778 50  $\mu$ m.

779 G. QRT-PCR detection of ISC markers in the intestinal sections of JWA<sup>IEC-wt</sup> and JWA<sup>IEC-ko</sup>  
780 mice; n=3 for each genotype.

781 H, I. Immunohistochemistry staining of lysozyme in the intestinal sections of JWA<sup>IEC-wt</sup> and  
782 JWA<sup>IEC-ko</sup> mice (H), and the lysozyme positive cell counts in crypts (I); n=3 for each genotype;  
783 scale bar: 50  $\mu$ m.

784 J, K. Immunofluorescence staining of muc2 in the intestinal sections of JWA<sup>IEC-wt</sup> and  
785 JWA<sup>IEC-ko</sup> mice (H), and the muc2 positive cell counts in villus-crypt units (I); n=3 for each  
786 genotype; scale bar: 100  $\mu$ m.

787 L-N. QRT-PCR detection of the absorption enterocytes marker *sis* in villi (L), Paneth cell  
788 marker *lyz1* in crypts (M), goblet cell marker *muc2*, enteroendocrine cell marker *gcg*, and tuft  
789 cell marker *dclk1* in villi (N) of JWA<sup>IEC-wt</sup> and JWA<sup>IEC-ko</sup> mice; n=3 for each genotype.

790 Data information: In (B, D, F, G, I, K-N), data are presented as mean  $\pm$  SD, \**P* <0.05, \*\**P*  
791 <0.01 and \*\*\**P* <0.001 (Student's *t*-test).

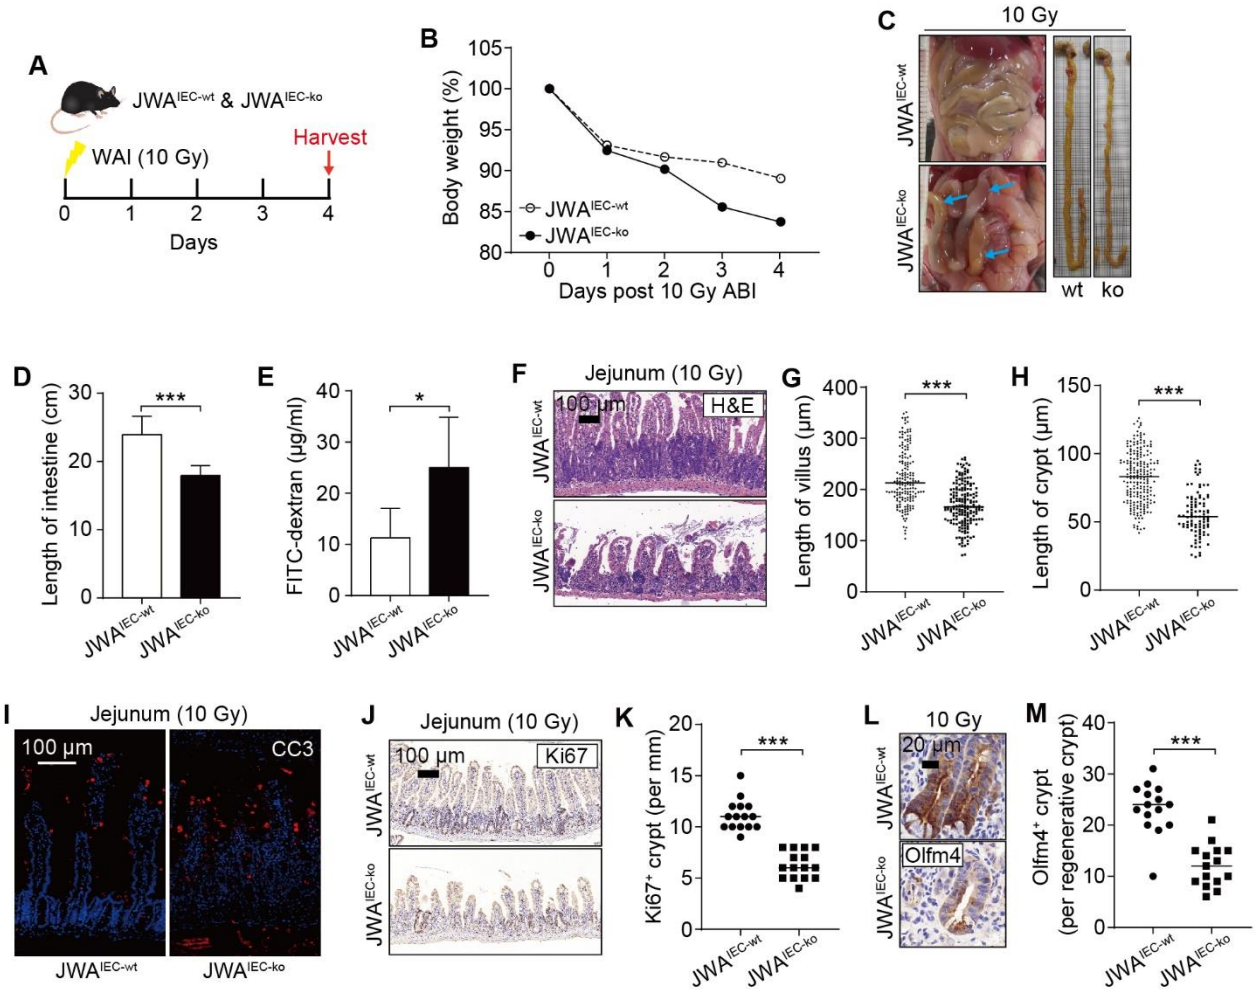

**Figure 4**

792

793 **Figure 4. Intestinal epithelial JWA deletion exacerbates injury and prevents**  
 794 **regeneration of intestinal epithelium after X-ray exposure.**

795 A. Timeline of the X-ray exposure model performed on  $JWA^{IEC-wt}$  and  $JWA^{IEC-ko}$  mice.

796 B. Bodyweight curve of  $JWA^{IEC-wt}$  and  $JWA^{IEC-ko}$  mice after X-ray exposure;  $n=6$  for  $JWA^{IEC-wt}$   
 797 mice and  $n=5$  for  $JWA^{IEC-ko}$  mice.

798 C. Representative abdominal cavity and intestinal images of  $JWA^{IEC-wt}$  and  $JWA^{IEC-ko}$  mice  
 799 after X-ray exposure.

800 D. Intestinal length of  $JWA^{IEC-wt}$  and  $JWA^{IEC-ko}$  mice after X-ray exposure;  $n=6$  for each  
 801 genotype.

802 E. Evaluate of intestinal epithelial permeability to FD4 in the  $JWA^{IEC-wt}$  and  $JWA^{IEC-ko}$  mice  
 803 after X-ray exposure;  $n=6$  for each genotype.

804 F-H. H&E staining of the jejunum sections of  $JWA^{IEC-wt}$  and  $JWA^{IEC-ko}$  mice after X-ray

805 exposure (F), and the length measurement of villi (G) and crypts (H); n=3 for each genotype;  
806 scale bar: 100µm.

807 I. Immunofluorescence staining of Cleaved caspase-3 in the intestinal sections of JWA<sup>IEC-wt</sup>  
808 and JWA<sup>IEC-ko</sup> mice after X-ray exposure; scale bar: 100 µm.

809 J, K. Immunohistochemistry staining of ki67 in the intestinal sections of JWA<sup>IEC-wt</sup> and JWA<sup>IEC-ko</sup>  
810 mice after X-ray exposure (J), and the ki67 positive crypts counts (K); n=3 for each genotype;  
811 scale bar: 100 µm.

812 L, M. Immunohistochemistry staining of olfm4 in the intestinal sections of JWA<sup>IEC-wt</sup> and JWA<sup>IEC-ko</sup>  
813 mice after X-ray exposure (L), and the olfm4 positive cells counts in the regenerative crypts  
814 (M); n=3 for each genotype; scale bar: 20 µm.

815 Data information: In (B), data are presented as mean; In (D, E, G, H, K, M), data are  
816 presented as mean ± SD, \**P* < 0.05 and \*\*\**P* < 0.001 (Student's *t*-test).



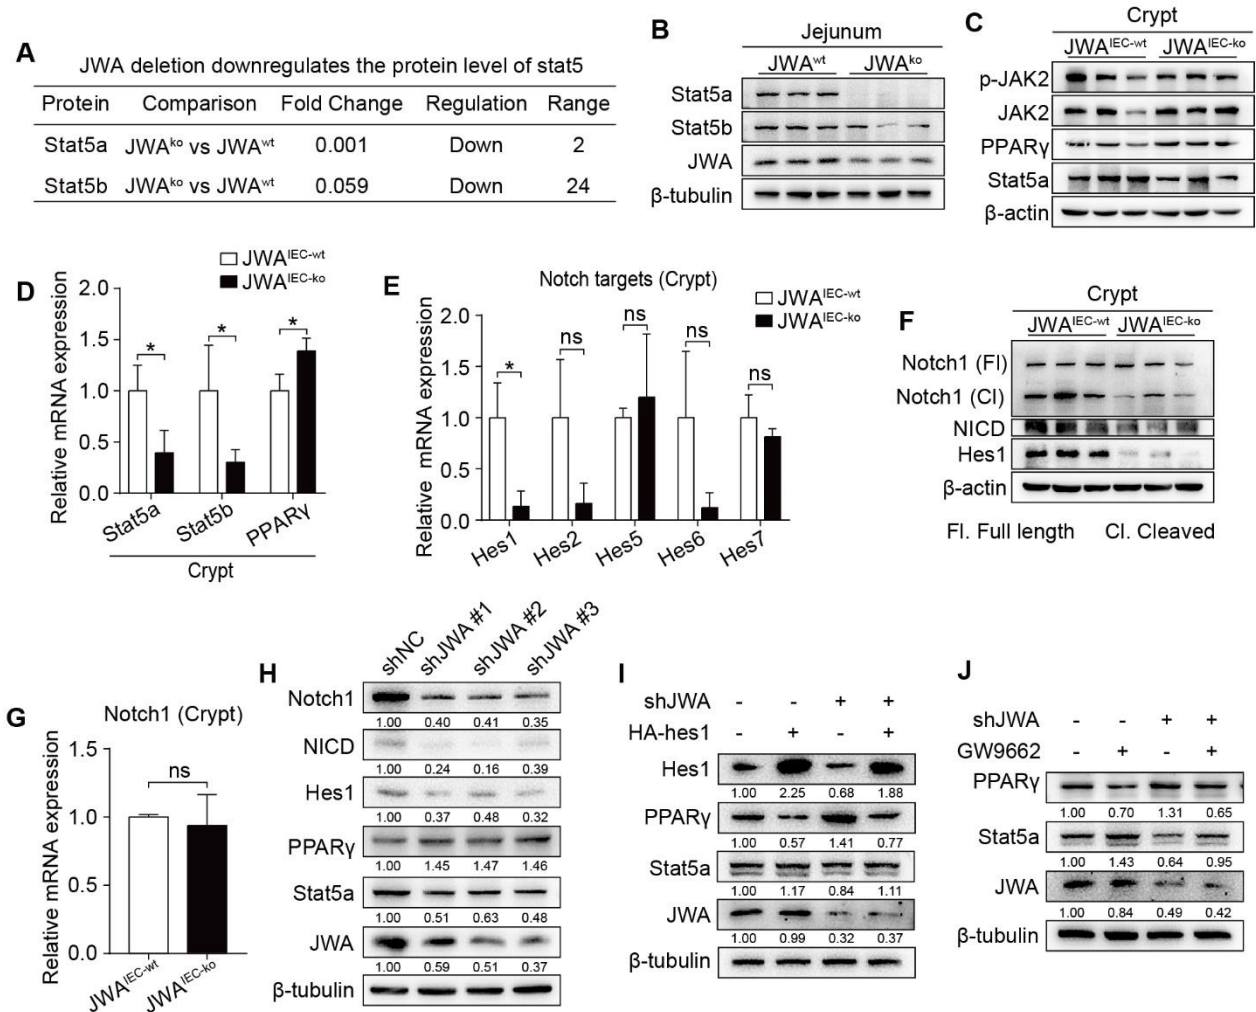

**Figure 5**

817

818 **Figure 5. JWA regulates PPAR $\gamma$ /Stat5 axis through Notch signal pathway.**

819 A. Screen of the down-regulated molecules Stat5 from the proteomics analysis performed  
820 on the jejunum of JWA<sup>wt</sup> and JWA<sup>ko</sup> mice.

821 B. Immunoblotting of Stat5a, Stat5b and JWA in the jejunum of JWA<sup>wt</sup> and JWA<sup>ko</sup> mice; n=3  
822 for each genotype.

823 C. Immunoblotting of PPAR $\gamma$ , Stat5a, Stat5b, JAK2 and p-JAK2 in the crypts of JWA<sup>IEC-wt</sup> and  
824 JWA<sup>IEC-ko</sup> mice; n=3 for each genotype.

825 D. QRT-PCR detection of Stat5a, Stat5b and PPAR $\gamma$  levels in the crypts of JWA<sup>IEC-wt</sup> and  
826 JWA<sup>IEC-ko</sup> mice; n=3 for each genotype.

827 E. QRT-PCR detection of Notch target genes hes1, hes2, hes5, hes6 and hes7 in the crypts  
828 of JWA<sup>IEC-wt</sup> and JWA<sup>IEC-ko</sup> mice; n=3 for each genotype.

829 F. Immunoblotting of full-length Notch1, cleaved Notch1, NICD and hes1 in the crypts of  
830 JWA<sup>IEC-wt</sup> and JWA<sup>IEC-ko</sup> mice; n=3 for each genotype.

831 G. QRT-PCR detection of Notch1 levels in the crypts of JWA<sup>IEC-wt</sup> and JWA<sup>IEC-ko</sup> mice; n=3  
832 for each genotype.

833 H. Immunoblotting of JWA, Stat5a, PPAR $\gamma$ , hes1, NICD and Notch1 in IEC-6 cells  
834 transfected with shJWA plasmids.

835 I. Immunoblotting of JWA, Stat5a, PPAR $\gamma$  and hes1 in IEC-6 cells co-transfected with shJWA  
836 and HA-hes1 plasmids.

837 J. Immunoblotting of JWA, Stat5a and PPAR $\gamma$  in IEC-6 cells transfected with shJWA plasmid  
838 followed by GW9662 (10  $\mu$ M) treatment.

839 Data information: In (D, E, G), data are presented as mean  $\pm$  SD, \* $P$  <0.05 and \*\*\* $P$  <0.001  
840 (Student's  $t$ -test).

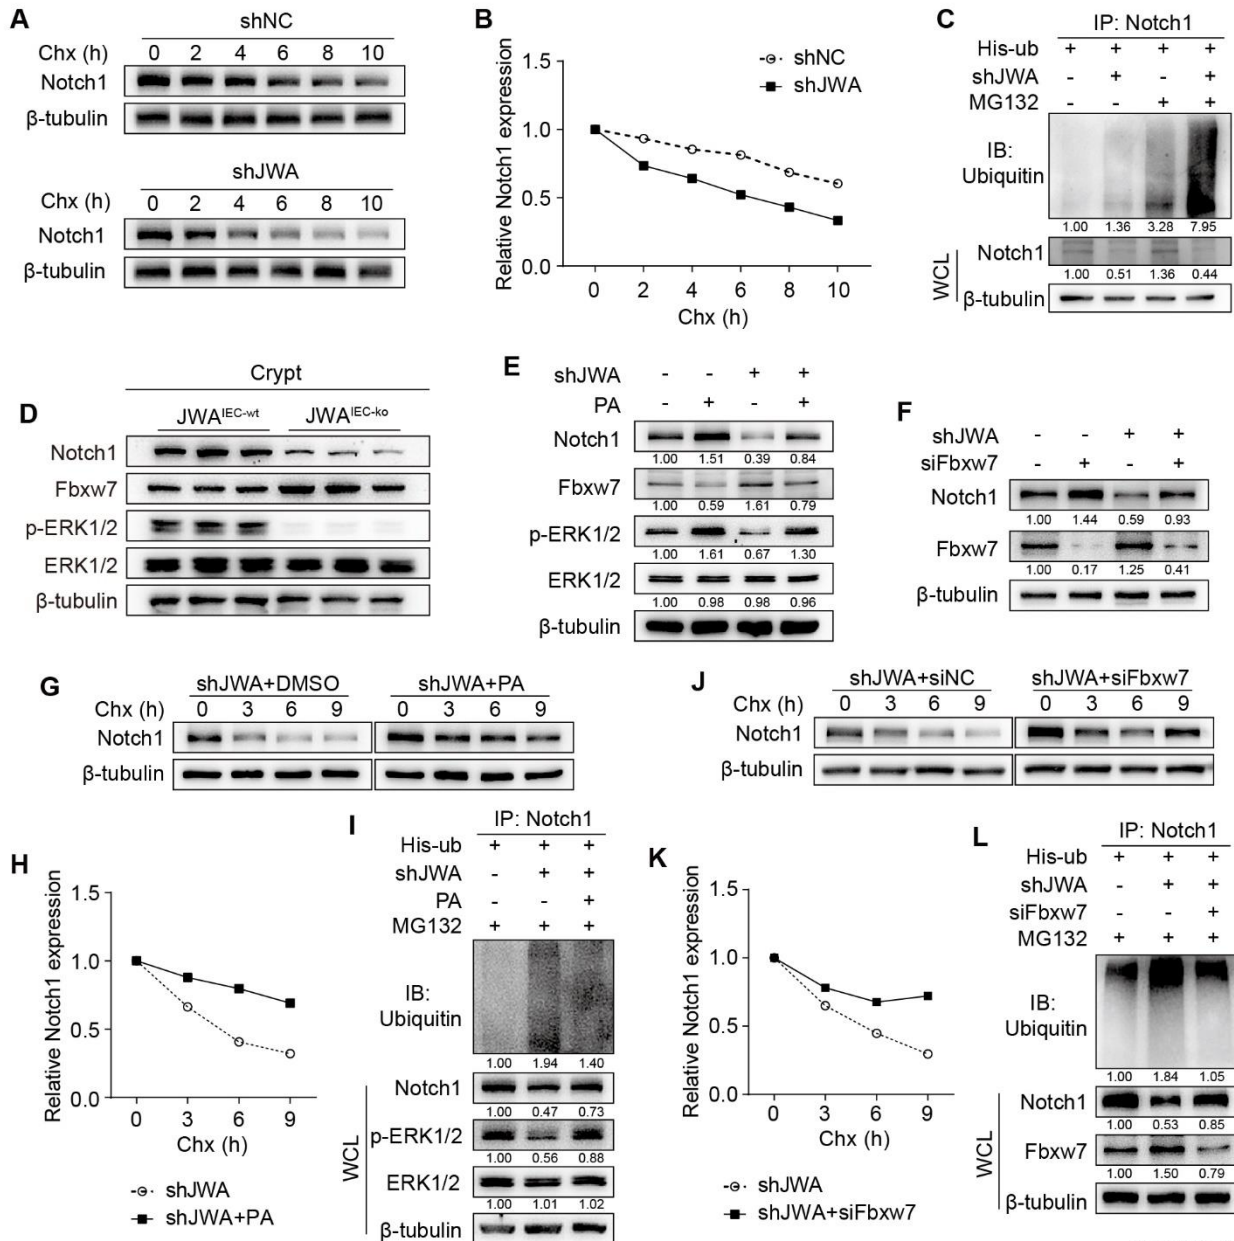

Figure 6

841

842 **Figure 6. JWA deficiency promotes ubiquitination degradation of Notch1 through**  
 843 **ERK/MAPK/Fbxw7 axis.**

844 A, B. CHX-chase assay in IEC-6 cells transfected with shNC or shJWA plasmid.

845 C. *In vitro* ubiquitination assay of Notch1 protein in IEC-6 cells co-transfected with shJWA  
 846 plasmid.

847 D. Immunoblotting of Notch1, Fbxw7, ERK and p-ERK1/2 in the crypts of JWA<sup>IEC-wt</sup> and  
 848 JWA<sup>IEC-ko</sup> mice; n=3 for each genotype.

849 E. Immunoblotting of Notch1, Fbxw7, ERK and p-ERK1/2 in IEC-6 cells transfected with  
 850 shJWA plasmids followed with Pamoic Acid (10  $\mu$ M) treatment.

851 F. Immunoblotting of Notch1 and Fbxw7 in IEC-6 cells co-transfected with shJWA plasmid  
852 and siFbxw7.

853 G, H. CHX-chase assay in IEC-6 cells transfected with shJWA plasmid followed by Pamoic  
854 Acid (10  $\mu$ M) treatment.

855 I. *In vitro* ubiquitination assay of Notch1 protein in IEC-6 cells co-transfected with shJWA  
856 followed by Pamoic Acid (10  $\mu$ M) treatment.

857 J, K. CHX-chase assay in IEC-6 cells co-transfected with shJWA plasmid and siFbxw7.

858 L. *In vitro* ubiquitination assays of Notch1 protein in IEC-6 cells co-transfected with shJWA  
859 and siFbxw7.

860

861

862

863

864

865

866

867

868

869

870

871

872

873

874

875

876

877

878

879

880

881 **Expanded View Figure Legends**

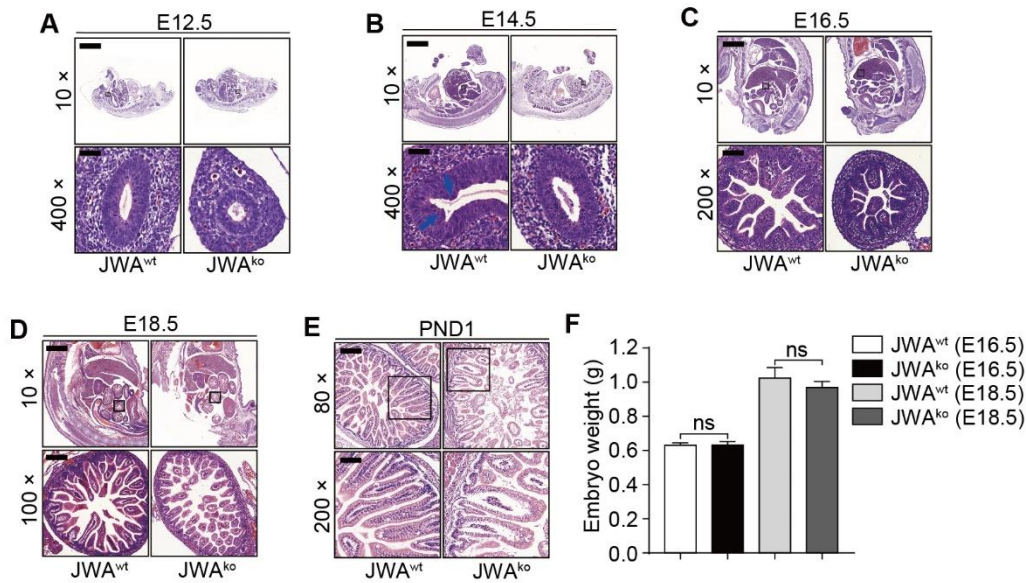

Figure EV1

882

883 **Figure EV1. JWA deletion delays the early development of intestinal epithelium in**  
884 **mice**

885 A-D. H&E staining of the mice embryo sections at embryonic day E12.5 (A), E14.5 (B),  
886 E16.5 (C) and E18.5 (D); Scale bar: 1600  $\mu$ m for 10 $\times$ , 160  $\mu$ m for 100 $\times$ , 80  $\mu$ m for 200 $\times$  and  
887 40  $\mu$ m for 400 $\times$ .

888 E. H&E staining of the intestine in newborn mice on the postnatal day 1 (PND1); Scale bar:  
889 200  $\mu$ m for 80 $\times$  and 80  $\mu$ m for 200 $\times$ .

890 F. Embryonic weight of the mice embryo at E16.5 and E18.5.

891 Data information: In (F), data are presented as mean  $\pm$  SD, <sup>ns</sup> No significance (Student's  
892 *t*-test).

893

894

895

896

897

898

899

900

901

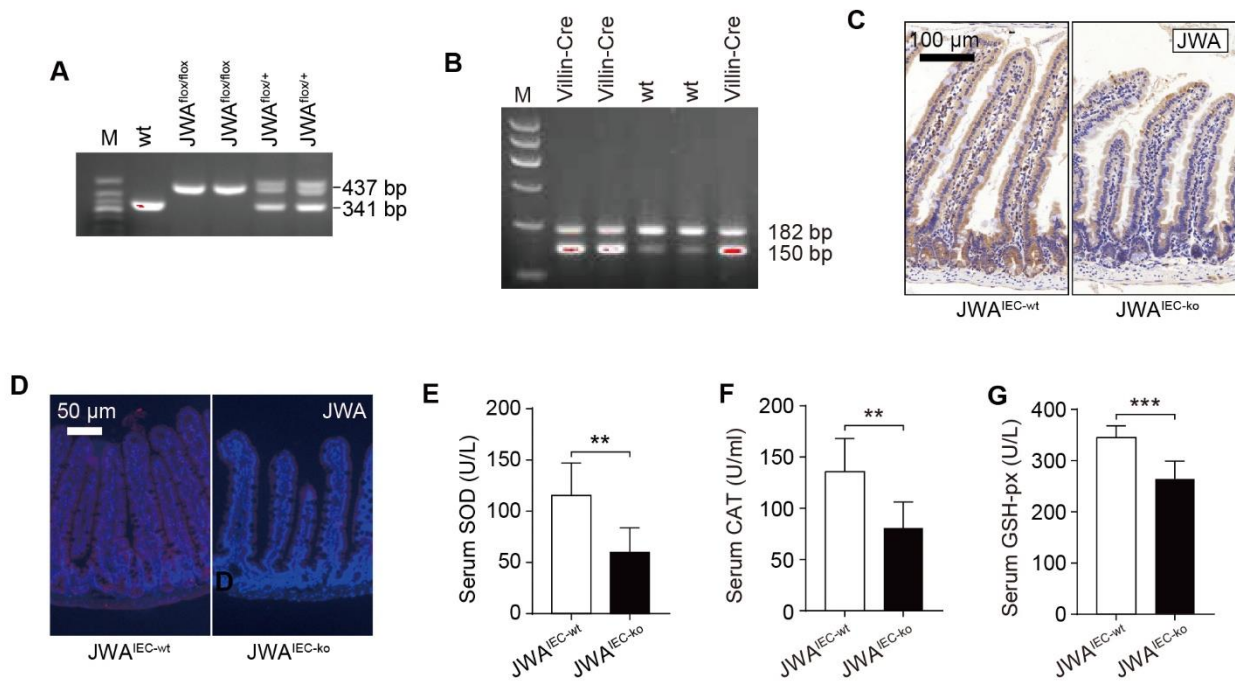

Figure EV2

902

903 **Figure EV2. Intestinal epithelial JWA deletion reduces the antioxidant enzyme activity**  
904 **in aged mice.**

905 A, B. Agarose gel electrophoresis images of mouse genotyping.

906 C. Immunohistochemistry staining of JWA in the intestinal sections of JWA<sup>IEC-wt</sup> and JWA<sup>IEC-ko</sup>  
907 mice; scale bar: 100  $\mu$ m.

908 D. Immunofluorescence staining of JWA in the intestinal sections of JWA<sup>IEC-wt</sup> and JWA<sup>IEC-ko</sup>  
909 mice; scale bar: 50  $\mu$ m.

910 E-G. Activities of the antioxidant enzymes SOD (E), CAT (F) and GSH-px (G) in the serum of  
911 10-month-old JWA<sup>IEC-wt</sup> and JWA<sup>IEC-ko</sup> mice.

912 Data information: In (E-G), data are presented as mean  $\pm$  SD, \*\* $P$  < 0.01 and \*\*\* $P$  < 0.001  
913 (Student's  $t$ -test).

914

915

916

917

918

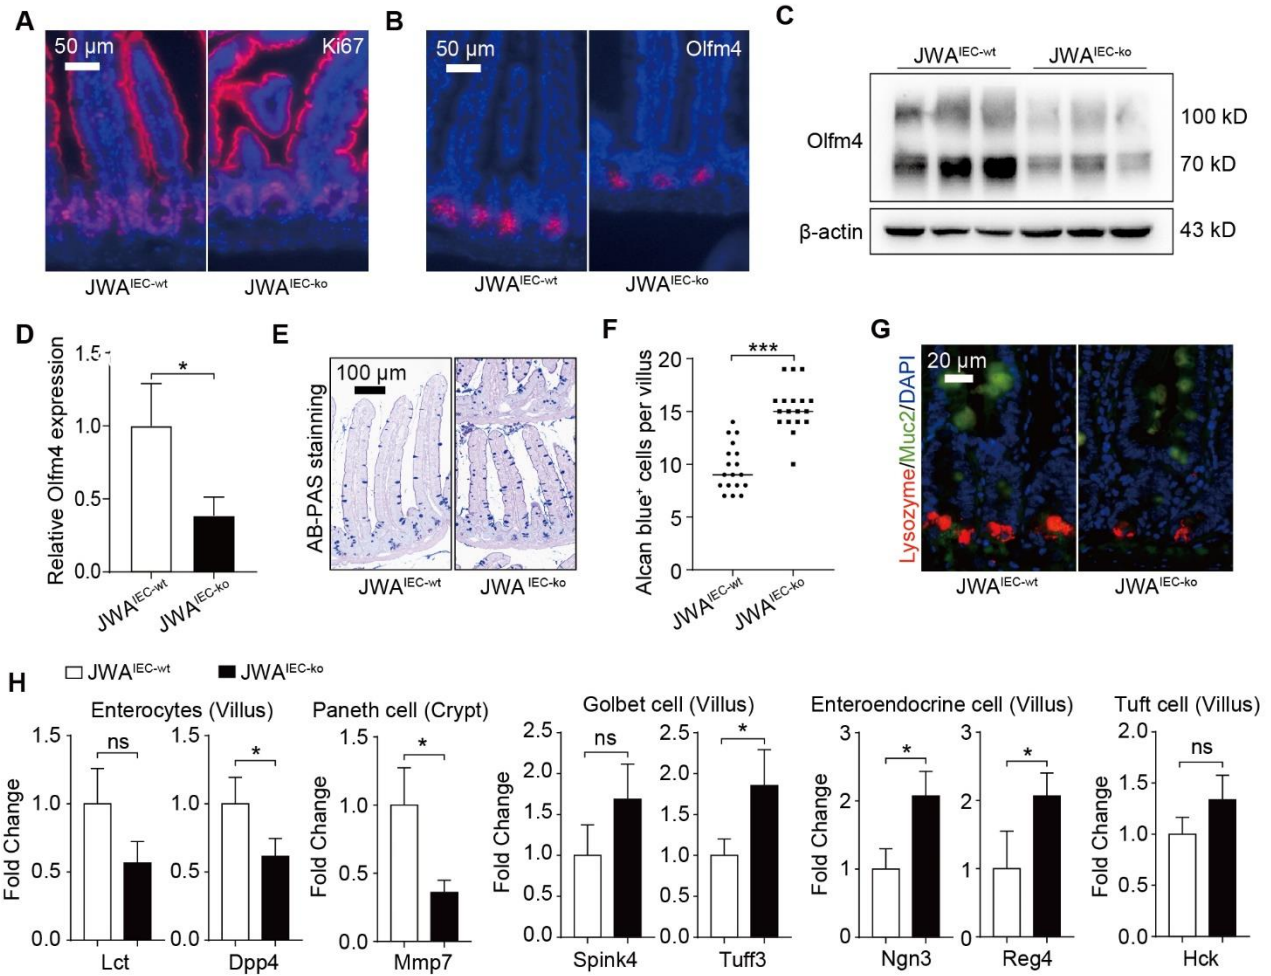

Figure EV3

919

920 **Figure EV3. Intestinal epithelial JWA deletion reduces intestinal stem cells and skews**  
921 **the distributions of intestinal epithelial cells lineage.**

922 A. Immunofluorescence staining of ki67 in the intestinal sections of JWA<sup>IEC-wt</sup> and JWA<sup>IEC-ko</sup>  
923 mice; scale bar: 50  $\mu$ m.

924 B. Immunofluorescence staining of olfm4 in the intestinal sections of JWA<sup>IEC-wt</sup> and JWA<sup>IEC-ko</sup>  
925 mice; scale bar: 50  $\mu$ m.

926 C, D. Immunoblotting of olfm4 (C) and relative olfm4 levels (D) in the crypts of JWA<sup>IEC-wt</sup> and  
927 JWA<sup>IEC-ko</sup> mice; n=3 for each genotype.

928 E, F. Alcian blue staining for the goblet cells (E) and counts for the AB positive cells (F) in  
929 villus of JWA<sup>IEC-wt</sup> and JWA<sup>IEC-ko</sup> mice; n=3 for each genotype; Scale bar: 100  $\mu$ m.

930 G. Immunofluorescence co-staining of lysozyme and muc2 in the intestinal sections of

931 JWA<sup>IEC-wt</sup> and JWA<sup>IEC-ko</sup> mice; scale bar: 20  $\mu$ m.

932 H. QRT-PCR detection of the absorption enterocytes markers (Lct, Dpp4) in villi; Paneth cell  
933 marker (Mmp7) in crypts; goblet cell markers (Spink4, Tuff3), enteroendocrine cell markers  
934 (Ngn3, Reg4), and tuft cell marker (Hck) in villi; n=3 for each genotype.

935 Data information: In (D, F, H), data are presented as mean  $\pm$  SD, <sup>ns</sup> No significance, \*  $P < 0.05$ ,  
936 \*\*  $P < 0.01$  and \*\*\*  $P < 0.001$  (Student's *t*-test).

937

938

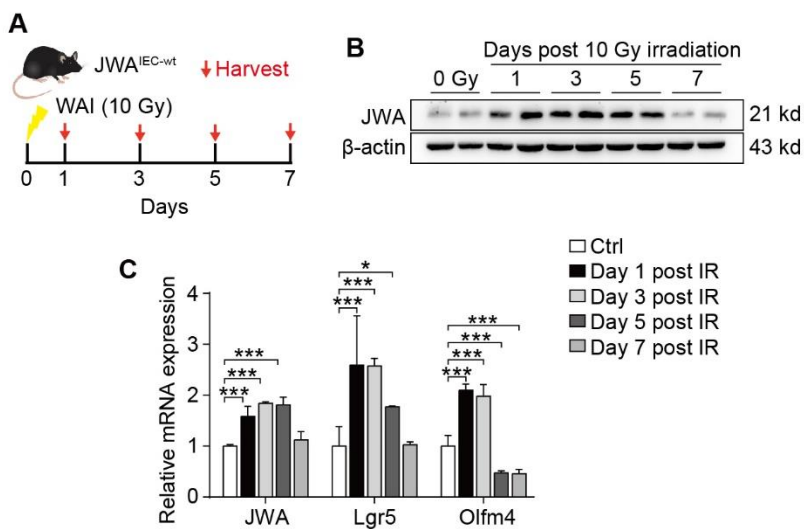

Figure EV4

939

940 **Figure EV4. JWA participates in intestinal stem cell regeneration after X-ray exposure.**

941 A. Timeline for the X-ray exposure model performed on wild-type mice.

942 B. Immunoblotting of JWA in the crypts of the wild-type mice at the indicated days after X-ray  
943 exposure.

944 C. QRT-PCR detection of JWA and the ISCs markers (lgr5, olfm4) levels in crypts of the  
945 wild-type mice at the indicated days after X-ray exposure; n=6 for each time point.

946 Data information: In (C), data are presented as mean  $\pm$  SD, <sup>ns</sup>No significance, \*  $P < 0.05$ , \*\*  $P$   
947  $< 0.01$  and \*\*\*  $P < 0.001$  (Student's *t*-test).

948

949

950



951

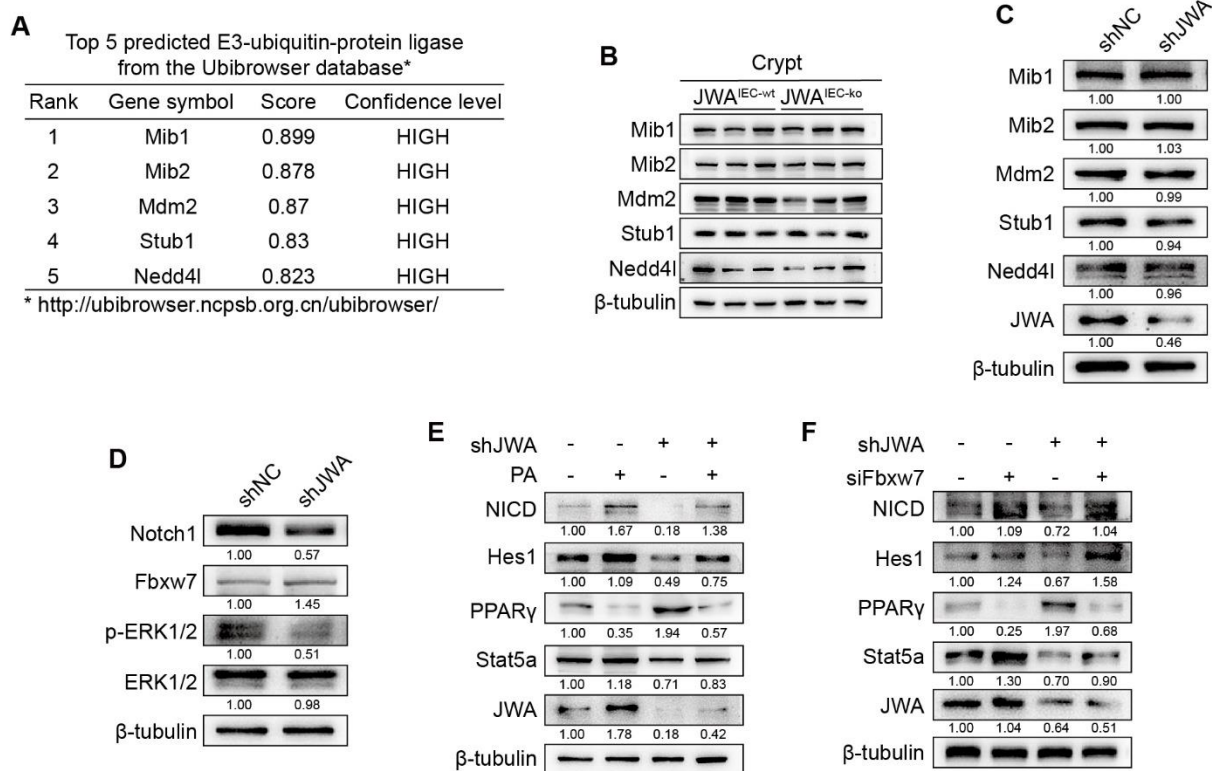

Figure EV5

952

953 **Figure EV5. JWA deficiency promotes ubiquitination degradation of Notch1 through**  
 954 **ERK /Fbxw7 and interferes with PPARγ/Stat5 axis.**

955 A. The predicted top five E3 ubiquitin ligases (Mib1, Mib2, Mdm2, Stub1 and Nedd4l) target  
 956 Notch1.

957 B. Immunoblotting of the predicted top five E3 ubiquitin ligases in crypts of JWA<sup>IEC-wt</sup> and  
 958 JWA<sup>IEC-ko</sup> mice.

959 C. Immunoblotting of the predicted top five E3 ubiquitin ligases in IEC-6 cells transfected  
 960 with shJWA plasmid.

961 D. Immunoblotting of Notch1, Fbxw7, ERK1/2 and p-ERK1/2 in IEC-6 cells transfected with  
 962 shJWA plasmid.

963 E. Immunoblotting of JWA, NICD, hes1, PPARγ and stat5a in IEC-6 cells transfected with  
 964 shJWA plasmid followed by Pamoic Acid (10 μM) treatment.

965 F. Immunoblotting of JWA, NICD, hes1, PPARγ and stat5a in IEC-6 cells co-transfected with  
 966 shJWA plasmid and siFbxw7.
